# Supplementary material
Source: PubMed Central journal article supplement (PMC4741329)
Supplement: supp_pp.15.00495_00495suppdata.pdf [file supp_pp.15.00495_00495suppdata.pdf]

|                                      | Whole Genome | BR regulated | BR upregulated | BR downregulated | BR-Glc coregulated | Synergistically regulated by BR and Glc | Antagonistically regulated by BR and Glc | Extent of BR regulation affected by Glc | Synergistic affect of Glc on extent of BR regulation | Antagonistic affect of Glc on extent of BR regulation |
|--------------------------------------|--------------|--------------|----------------|------------------|--------------------|-----------------------------------------|------------------------------------------|-----------------------------------------|------------------------------------------------------|-------------------------------------------------------|
| <b>A</b>                             |              | 303          | 190            | 113              | 217                | 125                                     | 92                                       | 256                                     | 110                                                  | 146                                                   |
| Nucleus                              | 37.73        | 31.14        | 32.04          | 29.63            | 31.40              | 31.93                                   | 30.68                                    | 28.83                                   | 26.67                                                | 30.77                                                 |
| Chloroplast                          | 15.83        | 11.77        | 9.39           | 15.74            | 14.49              | 11.77                                   | 18.18                                    | 12.61                                   | 10.48                                                | 14.53                                                 |
| Plasma membrane                      | 13.48        | 15.23        | 16.58          | 12.96            | 14.98              | 15.97                                   | 13.64                                    | 15.32                                   | 17.14                                                | 13.68                                                 |
| Mitochondria                         | 12.47        | 9.00         | 6.63           | 12.96            | 10.15              | 10.92                                   | 9.09                                     | 9.01                                    | 11.43                                                | 6.84                                                  |
| Extracellular                        | 10.68        | <b>22.15</b> | <b>24.86</b>   | <b>17.59</b>     | <b>20.77</b>       | <b>21.01</b>                            | <b>20.46</b>                             | <b>22.07</b>                            | <b>22.86</b>                                         | <b>21.37</b>                                          |
| Cytosol                              | 7.39         | 6.92         | 7.18           | 6.48             | 7.25               | 10.08                                   | 3.41                                     | 7.66                                    | 11.43                                                | 14.27                                                 |
| Plastid                              | 5.97         | 2.77         | 1.66           | 4.63             | 3.87               | 4.20                                    | 3.41                                     | 2.70                                    | 3.81                                                 | 1.71                                                  |
| Golgi apparatus                      | 4.14         | 5.54         | 7.74           | 1.85             | 6.76               | 5.04                                    | 9.09                                     | 5.86                                    | 5.71                                                 | 5.98                                                  |
| ER                                   | 3.11         | 3.11         | 3.32           | 2.78             | 2.90               | 3.36                                    | 2.27                                     | 15.30                                   | 4.76                                                 | 1.71                                                  |
| Cell wall                            | 2.72         | <b>9.00</b>  | <b>11.05</b>   | <b>5.56</b>      | <b>8.70</b>        | <b>7.56</b>                             | <b>10.23</b>                             | <b>9.01</b>                             | <b>10.48</b>                                         | <b>7.69</b>                                           |
| Ribosome                             | 2.01         | 0.35         | 0.00           | 0.93             | 0.48               | 0.84                                    | 0.00                                     | 0.45                                    | 0.95                                                 | 0.00                                                  |
| <b>B</b>                             |              |              |                |                  |                    |                                         |                                          |                                         |                                                      |                                                       |
| DNA or RNA binding                   | 16.20        | 9.89         | 9.47           | 10.58            | 9.69               | 7.83                                    | 12.35                                    | 9.57                                    | 8.08                                                 | 10.91                                                 |
| Transferase activity                 | 14.46        | 16.48        | 20.12          | 10.58            | 17.86              | 20.00                                   | 14.82                                    | 17.23                                   | 20.20                                                | 14.55                                                 |
| Hydrolase activity                   | 13.84        | 15.39        | 14.20          | 17.31            | 13.27              | 13.04                                   | 13.58                                    | 17.70                                   | 18.18                                                | 17.27                                                 |
| Nucleotide binding                   | 13.76        | 11.36        | 13.61          | 7.69             | 12.76              | 17.39                                   | 6.17                                     | 11.98                                   | 17.17                                                | 6.36                                                  |
| Protein binding                      | 12.19        | 10.26        | 10.65          | 9.62             | 10.20              | 9.57                                    | 11.11                                    | 9.57                                    | 10.10                                                | 9.09                                                  |
| Transcription factor activity        | 6.92         | <b>11.35</b> | <b>11.83</b>   | <b>10.58</b>     | <b>10.71</b>       | <b>12.17</b>                            | <b>8.64</b>                              | <b>10.05</b>                            | <b>11.11</b>                                         | <b>9.09</b>                                           |
| Kinase activity                      | 5.98         | 4.40         | 6.51           | 0.96             | 5.10               | 6.96                                    | 2.47                                     | 3.35                                    | 6.06                                                 | 0.91                                                  |
| Nucleic acid binding                 | 5.79         | 3.30         | 2.96           | 3.85             | 4.08               | 5.22                                    | 2.47                                     | 3.83                                    | 5.05                                                 | 2.73                                                  |
| Transporter activity                 | 5.62         | 3.30         | 1.18           | 6.73             | 3.06               | 3.48                                    | 2.47                                     | 3.35                                    | 4.04                                                 | 2.73                                                  |
| Structural molecule activity         | 2.20         | 0.37         | 0.59           | 0.00             | 0.51               | 0.00                                    | 1.24                                     | 0.48                                    | 0.00                                                 | 0.91                                                  |
| Receptor binding or activity         | 0.86         | 1.83         | 1.78           | 1.92             | 1.53               | 1.74                                    | 1.24                                     | 1.44                                    | 2.02                                                 | 0.91                                                  |
| <b>C</b>                             |              |              |                |                  |                    |                                         |                                          |                                         |                                                      |                                                       |
| Protein metabolism                   | 22.38        | 16.14        | 17.78          | 13.33            | 17.24              | 18.97                                   | 14.94                                    | 16.90                                   | 18.63                                                | 15.39                                                 |
| Response to stress                   | 18.36        | <b>29.83</b> | <b>36.11</b>   | <b>19.05</b>     | <b>31.53</b>       | <b>36.21</b>                            | <b>25.29</b>                             | <b>20.22</b>                            | <b>32.35</b>                                         | <b>26.50</b>                                          |
| Response to abiotic /biotic stimulus | 16.86        | <b>27.72</b> | <b>33.89</b>   | <b>17.14</b>     | <b>28.08</b>       | <b>31.03</b>                            | <b>24.14</b>                             | <b>26.48</b>                            | <b>28.43</b>                                         | <b>24.79</b>                                          |
| Cell organization and biogenesis     | 16.41        | 17.90        | 20.56          | 13.33            | 17.73              | 13.38                                   | 19.54                                    | 19.64                                   | 18.63                                                | 20.51                                                 |
| Transport                            | 15.25        | 14.74        | 15.56          | 13.33            | 14.29              | 13.79                                   | 14.94                                    | 15.53                                   | 12.75                                                | 17.95                                                 |
| Developmental processes              | 15.25        | 14.39        | 12.22          | 18.10            | 13.30              | 12.07                                   | 14.94                                    | 14.61                                   | 14.71                                                | 14.53                                                 |
| Transcription, DNA-dependent         | 12.31        | 12.98        | 13.33          | 12.38            | 12.81              | 14.66                                   | 10.35                                    | 11.42                                   | 12.75                                                | 10.26                                                 |
| Signal transduction                  | 9.38         | <b>18.25</b> | <b>21.67</b>   | <b>12.38</b>     | <b>17.24</b>       | <b>18.10</b>                            | <b>16.09</b>                             | <b>17.35</b>                            | <b>20.59</b>                                         | <b>14.53</b>                                          |
| DNA or RNA metabolism                | 3.99         | 1.05         | 0.56           | 1.91             | 1.48               | 0.86                                    | 2.30                                     | 1.37                                    | 0.98                                                 | 1.71                                                  |
| Energy pathways                      | 2.84         | 1.40         | 1.67           | 0.95             | 0.49               | 0.00                                    | 1.15                                     | 1.83                                    | 0.00                                                 | 3.42                                                  |

**Supplemental figure S1.** Functional categorization of BR- and Glc- regulated genes on the basis of **A**, gene ontology (GO) cellular component; **B**, gene ontology (GO) molecular function; and **C**, gene ontology (GO) biological process. (The numbers highlighted in red show % values of most enriched GO category as compared to whole genome categorization).

|                          | BR regulated | BR up-regulated | BR down-regulated | BR-Glc co regulated | Synergistically regulated by BR and Glc | Antagonistically regulated by BR and Glc | Extent of BR regulation affected by Glc | Synergistic affect of Glc on extent of BR regulation | Antagonistic affect of Glc on extent of BR regulation |
|--------------------------|--------------|-----------------|-------------------|---------------------|-----------------------------------------|------------------------------------------|-----------------------------------------|------------------------------------------------------|-------------------------------------------------------|
| <b>Total no of genes</b> | 811          | 527             | 284               | 673                 | 371                                     | 302                                      | 712                                     | 336                                                  | 376                                                   |
| <b>No. of TF</b>         | 75           | 46              | 29                | 60                  | 30                                      | 30                                       | 66                                      | 28                                                   | 38                                                    |
| <b>%</b>                 | <b>9.2</b>   | <b>8.7</b>      | <b>10.2</b>       | <b>8.9</b>          | <b>8.1</b>                              | <b>9.9</b>                               | <b>9.3</b>                              | <b>8.3</b>                                           | <b>10.1</b>                                           |

|           |                     |    |   |   |    |   |   |    |   |    |
|-----------|---------------------|----|---|---|----|---|---|----|---|----|
| <b>1</b>  | <b>ABI3VP1</b>      | 1  | 1 | 0 | 0  | 0 | 0 | 1  | 1 | 0  |
| <b>2</b>  | <b>AP2-EREBP</b>    | 15 | 9 | 6 | 13 | 5 | 8 | 15 | 4 | 11 |
| <b>3</b>  | <b>bHLH</b>         | 10 | 5 | 5 | 5  | 2 | 3 | 10 | 3 | 7  |
| <b>4</b>  | <b>bZIP</b>         | 2  | 0 | 2 | 2  | 1 | 1 | 1  | 0 | 1  |
| <b>5</b>  | <b>BZR</b>          | 1  | 0 | 1 | 0  | 0 | 0 | 1  | 1 | 0  |
| <b>6</b>  | <b>C2C2-CO-like</b> | 2  | 1 | 1 | 2  | 1 | 1 | 1  | 0 | 1  |
| <b>7</b>  | <b>C2C2-GATA</b>    | 1  | 1 | 0 | 1  | 1 | 0 | 1  | 1 | 0  |
| <b>8</b>  | <b>C2H2</b>         | 6  | 5 | 1 | 6  | 5 | 1 | 6  | 5 | 1  |
| <b>9</b>  | <b>C3H</b>          | 5  | 4 | 1 | 5  | 1 | 4 | 5  | 1 | 4  |
| <b>10</b> | <b>GRAS</b>         | 2  | 1 | 1 | 2  | 1 | 1 | 1  | 0 | 1  |
| <b>11</b> | <b>GRF</b>          | 1  | 1 | 0 | 0  | 0 | 0 | 0  | 0 | 0  |
| <b>12</b> | <b>Homeobox</b>     | 5  | 1 | 4 | 3  | 2 | 1 | 4  | 3 | 1  |
| <b>13</b> | <b>HSF</b>          | 4  | 4 | 0 | 4  | 3 | 1 | 3  | 2 | 1  |
| <b>14</b> | <b>MYB</b>          | 10 | 6 | 4 | 8  | 4 | 4 | 9  | 4 | 5  |
| <b>15</b> | <b>NAC</b>          | 6  | 4 | 2 | 5  | 3 | 2 | 5  | 3 | 2  |
| <b>16</b> | <b>Trihelix</b>     | 1  | 0 | 1 | 1  | 0 | 1 | 1  | 0 | 1  |
| <b>17</b> | <b>WRKY</b>         | 3  | 3 | 0 | 3  | 1 | 2 | 2  | 0 | 2  |

**Supplemental figure S2.** Transcription factor family enrichment analysis of BR- and Glc-regulated genes (1.5 fold +/-) in etiolated seedlings.

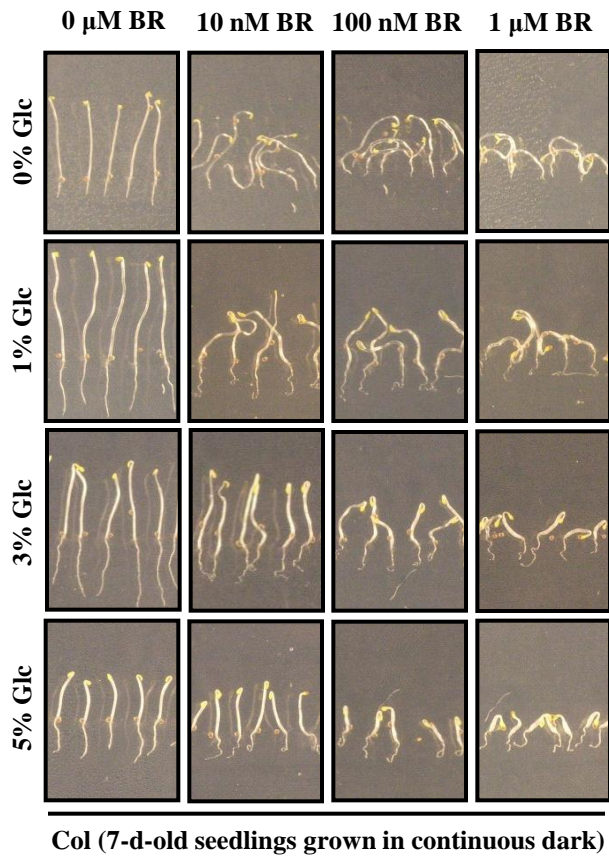

**Supplemental figure S3.** Regulation of hypocotyl growth by Glc and BR in etiolated seedlings.

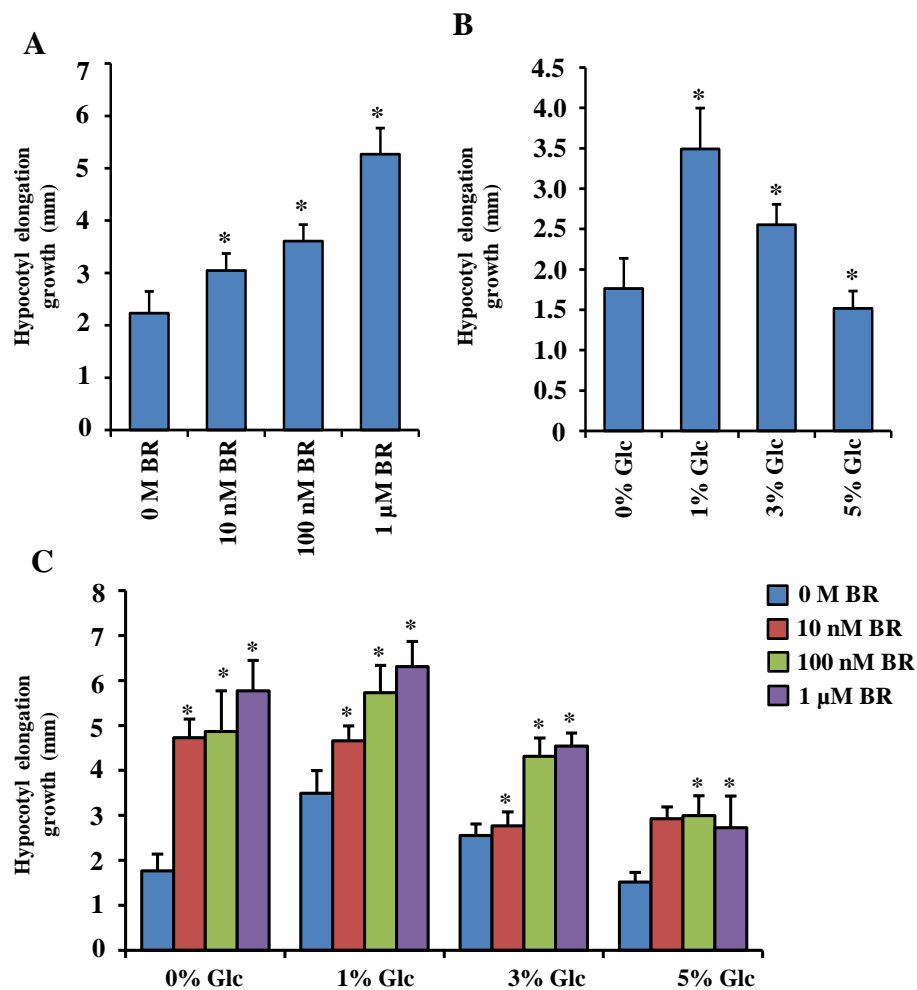

**Supplemental figure S4. Glc and BR regulation of hypocotyl elongation growth in light grown seedlings.**

**A**, Quantification of hypocotyl length in 7-d-old light grown WT (Col-0) seedlings treated without or with increasing concentrations of BR. **B**, Quantification of hypocotyl length in 7-d-old light grown WT (Col-0) seedlings treated without or with increasing concentrations of Glc. **C**, Quantification of hypocotyl length in 7-d-old light grown WT (Col-0) seedlings growing on Glc free or increased Glc concentration containing ½ MS medium supplemented without or with increasing concentrations of BR. Glc and BR work antagonistically at lower Glc concentration but act synergistically at higher Glc concentrations for hypocotyl elongation regulation. Values represent the average from a representative biological replicate having 15 seedlings and error bars represent SD. (Student's T-test,  $P < 0.001$ ; \* control vs. treatment).

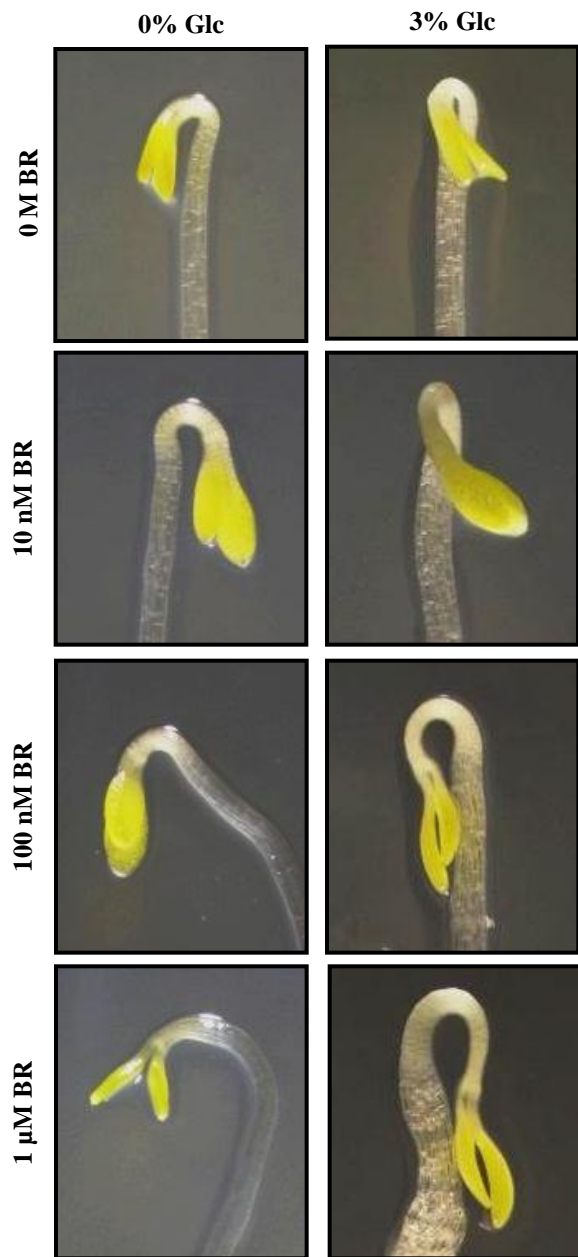

**Supplemental figure S5.** Regulation of apical hook development by Glc and BR in etiolated seedlings.

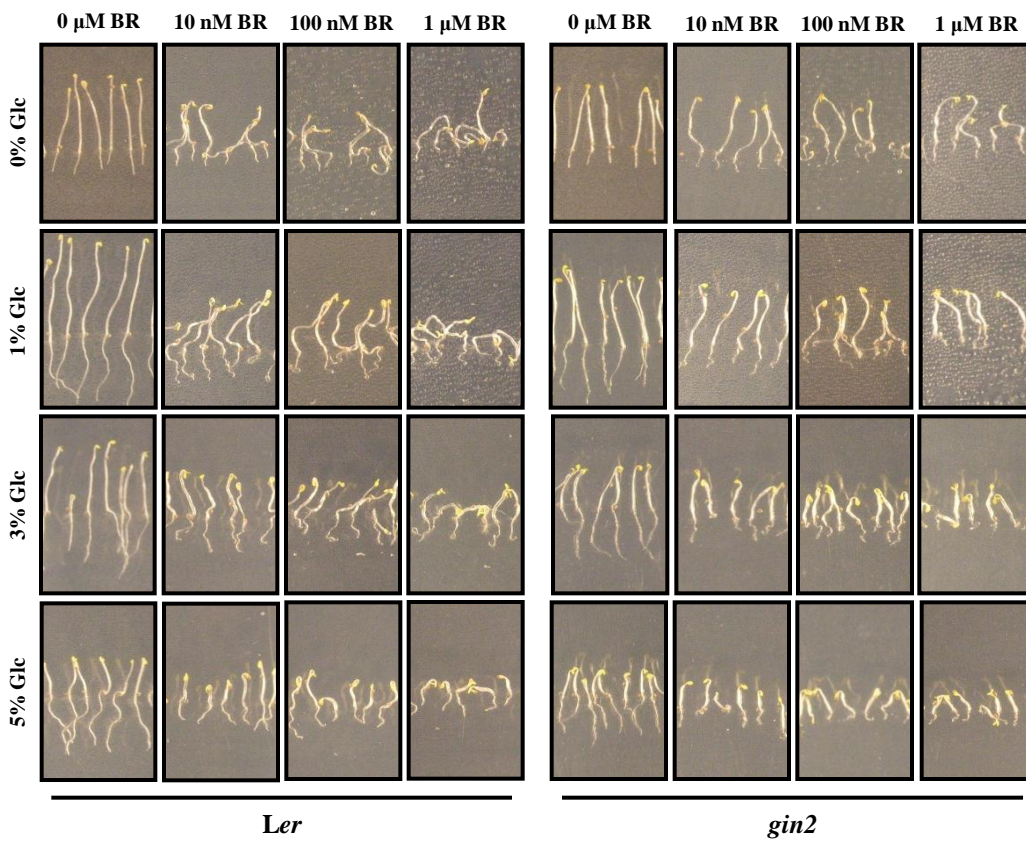

**Supplemental figure S6.** Glc-BR regulation of hypocotyl growth in HXK1-dependent Glc signaling mutant *gin2-1*.

**A**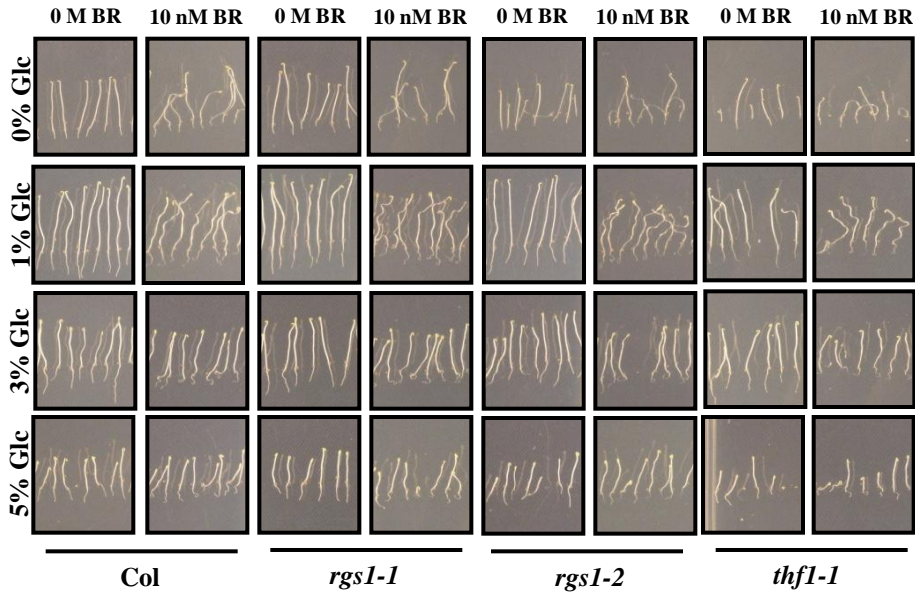**B**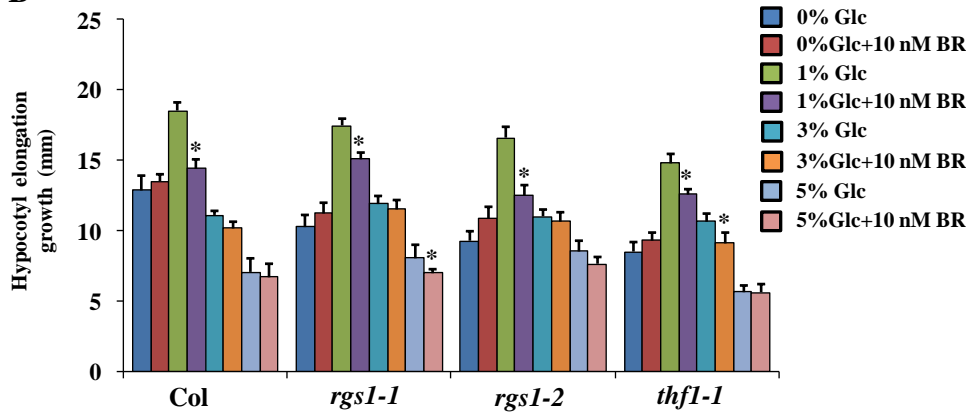

### Supplemental figure S7. Glc-BR control of hypocotyl length in HXK1-independent pathway mutants *rgs1* and *thf1*

**A**, Pictures and **B**, Quantification of etiolated hypocotyl growth in 7-d-old seedlings of WT (Col-0) and HXK1-independent pathway mutants *rgs1-1*, *rgs1-2* and *thf1-1* growing on Glc free (0%) or increasing Glc concentration (1%, 3%, 5%) containing ½ MS media supplemented without or with 10 nM BR. The *rgs1-1*, *rgs1-2* and *thf1-1* mutants were found to have similar sensitivity towards BR application at different Glc concentrations as compared to WT. Values represent the average from two biological replicates each having 30 seedlings and error bars represent SE. Student's T-test,  $P < 0.05$ .



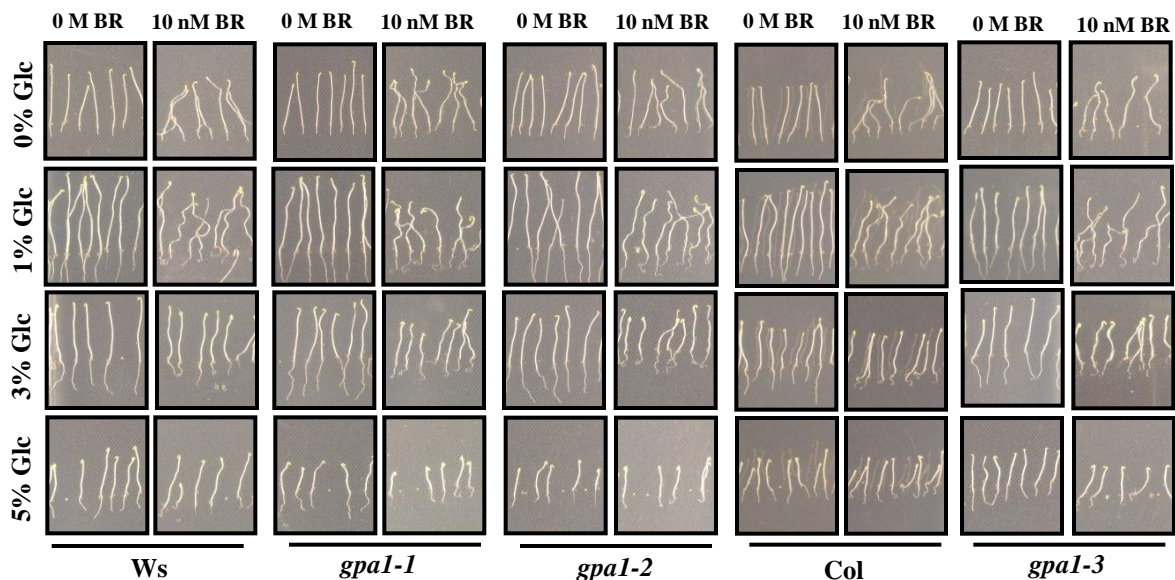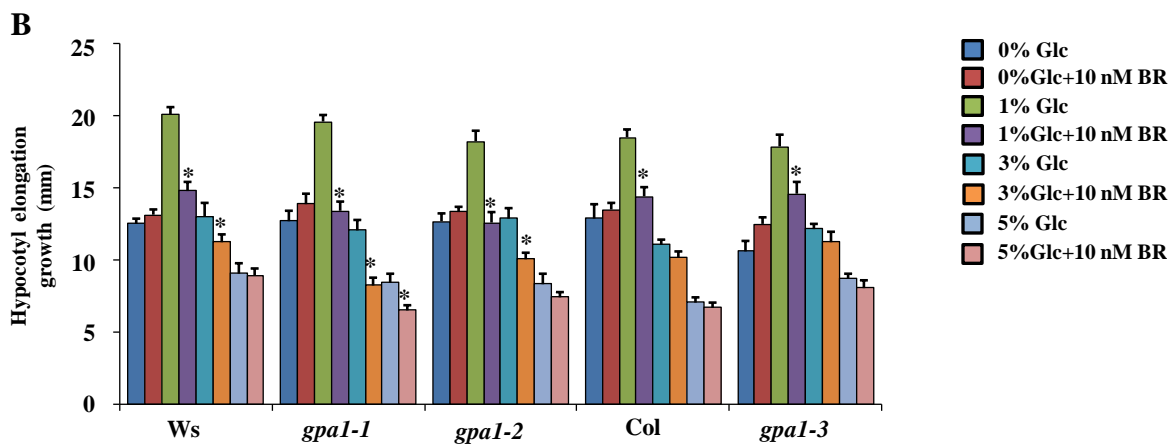

**Supplemental figure S8. Glc-BR control of hypocotyl length in HXK1-independent pathway mutants *gpa1***

**A**, Pictures and **B**, Quantification of etiolated hypocotyl growth in 7-d-old seedlings of WT (Col-0, Ws) and HXK1-independent pathway mutants *gpa1-1*, *gpa1-2* and *gpa1-3* growing on Glc free (0%) or increasing Glc concentration (1%, 3%, 5%) containing ½ MS media supplemented without or with 10 nM BR. The mutants *gpa1-1*, *gpa1-2* and *gpa1-3* were found to have similar sensitivity towards BR application at different Glc concentrations as compared to their respective WT. Values represent the average from two biological replicates each having 30 seedlings and error bars represent SE. Student's T-test, P < 0.05.



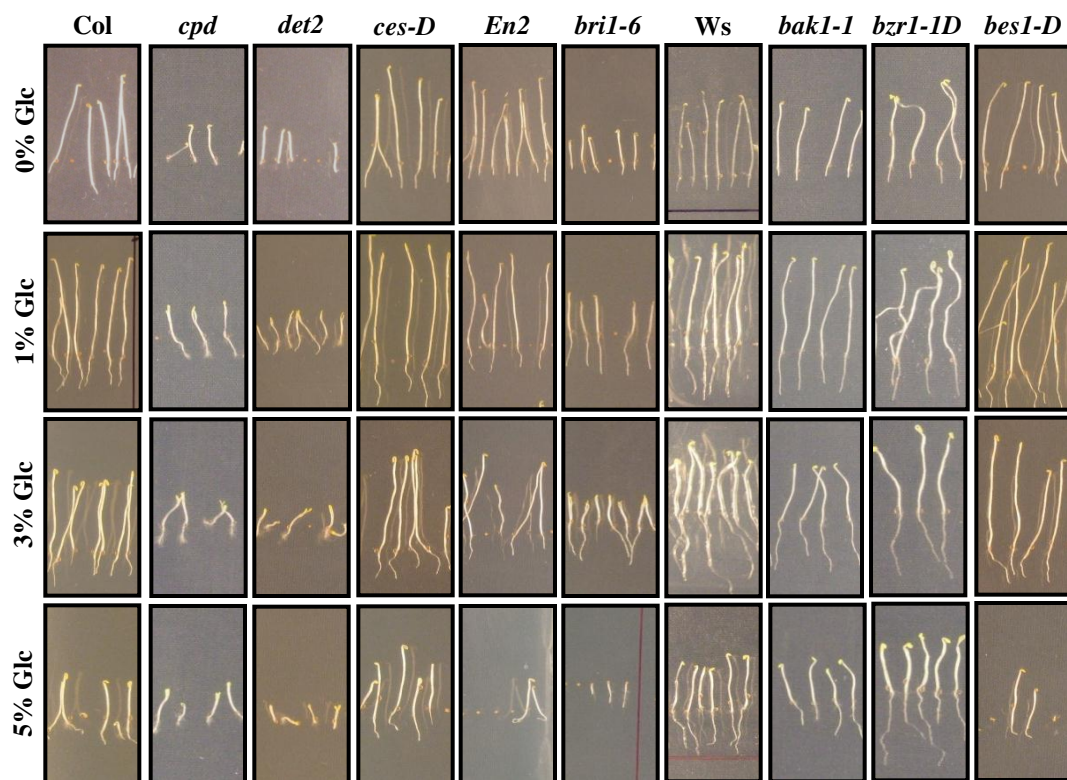

Supplemental figure S9. Glc regulation of hypocotyl growth in BR signaling mutants.

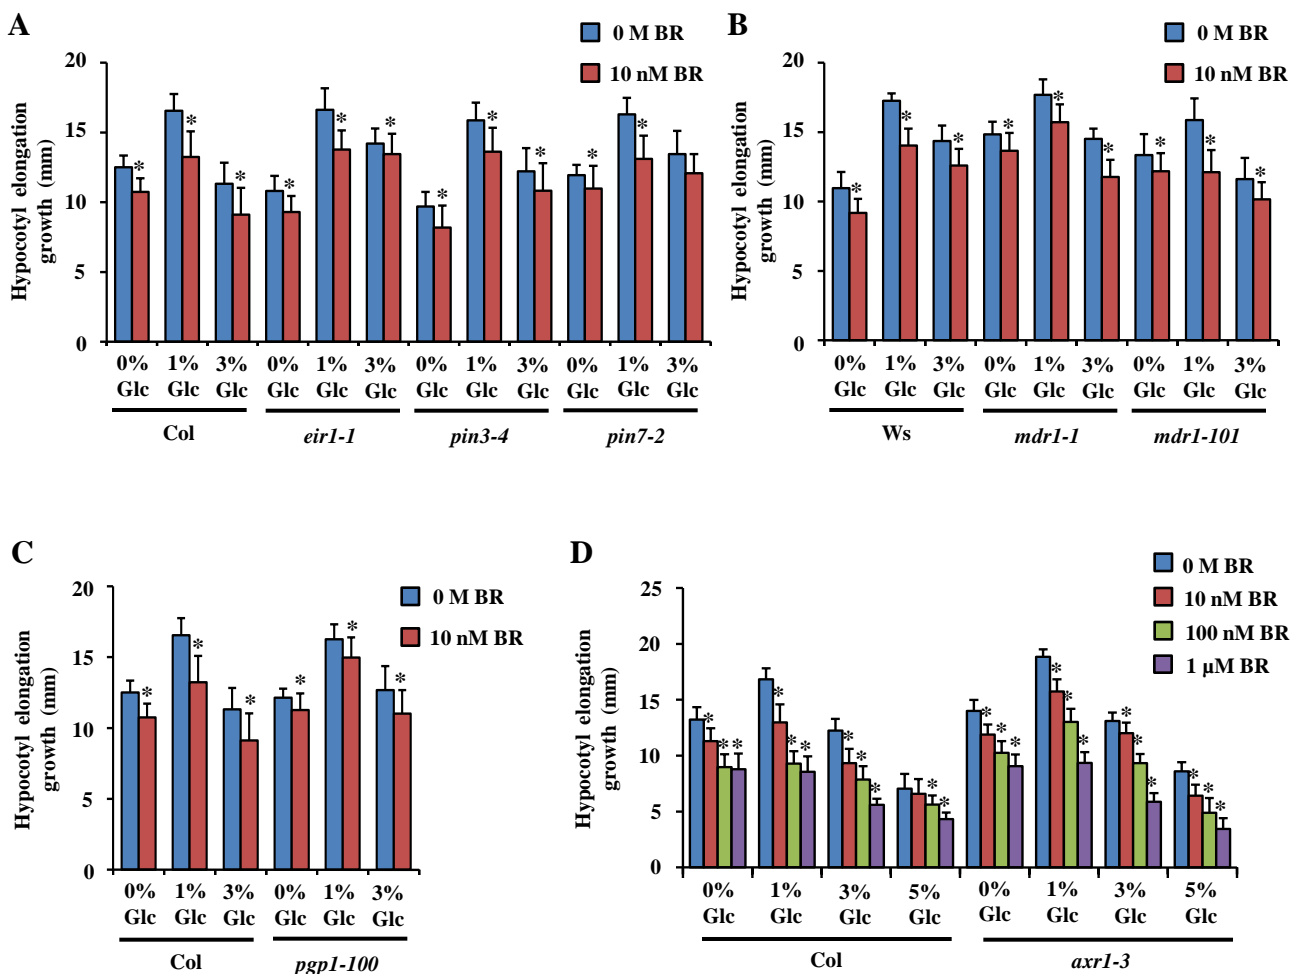

**Supplemental figure S10. Glc-BR control of hypocotyl elongation growth in auxin transport/signaling defective mutants.**

**A-D**, Quantification of hypocotyl length in 7-d-old etiolated WT (Col-0, Ws); auxin transport defective mutants: *eir1-1*, *pin3-4*, *pin7-2*, *mdr1-1*, *mdr1-101*, *pgp1-100*; and auxin-signaling mutant *axr1-3* seedlings growing in independent or combined Glc/BR treatment media.

Values represent the average from two independent biological replicates each having 20 seedlings and error bars represent SE. (Student's T-test,  $P < 0.05$ ; \* control vs. treatment).

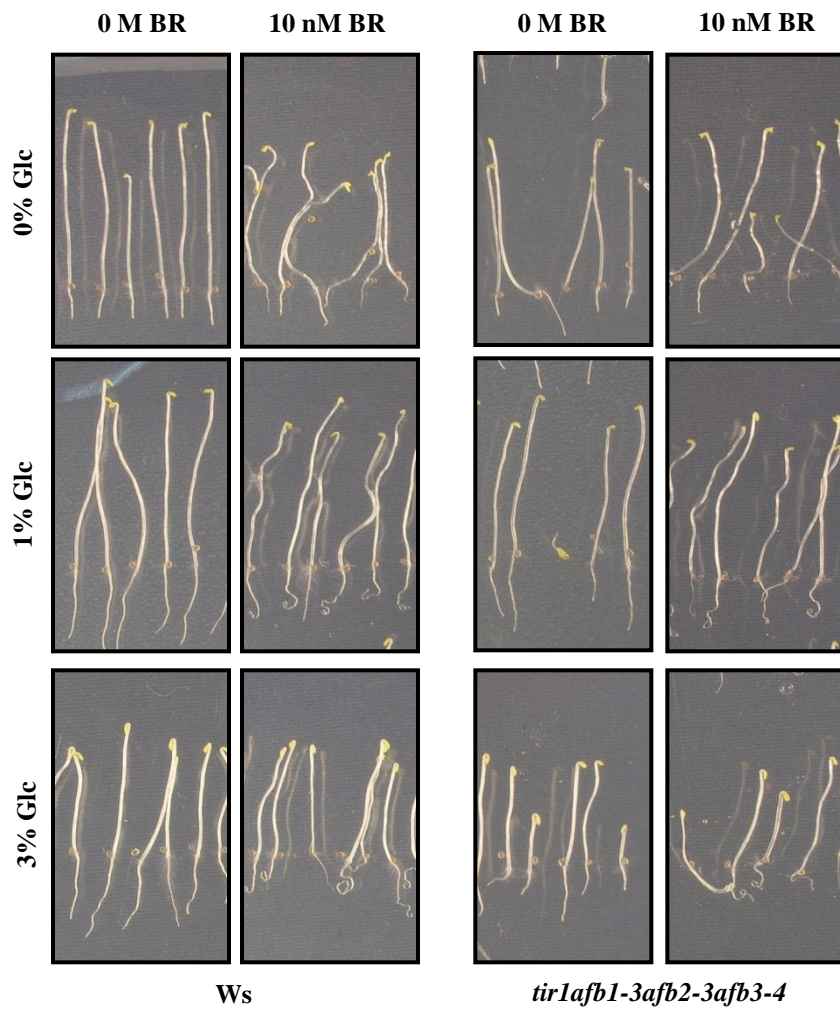

**Supplemental figure S11.** Glc-BR regulation of etiolated hypocotyl elongation growth in auxin perception mutant.

| S.no. | Gene name     | Representative Public ID | Forward (5' ---- 3')           | Reverse (5' ---- 3')         |
|-------|---------------|--------------------------|--------------------------------|------------------------------|
| 1.    | <i>DWF4</i>   | <i>AT3G50660</i>         | GCATCATACTCTCTTACCTCTTCTT      | CCAAATTTTTATATATCATTGGGCA    |
| 2.    | <i>BR6OX1</i> | <i>AT5G38970</i>         | TCCTCTGCGTGCATAAAATCTATATT     | GCACCAAAGGCTTCCATCTT         |
| 3.    | <i>BR6OX2</i> | <i>AT3G30180</i>         | TCTCTCTTTCTCTCTGTACATTATCCATCT | AGGGTCATTTTGTAGGGCTAATTAAC   |
| 4.    | <i>IAA19</i>  | <i>AT3G15540</i>         | CGGATGCTACCGGGTTG              | TGCTTCTTGTCAAGTCATCATCA      |
| 5.    | <i>ARF6</i>   | <i>AT1G30330</i>         | GGTCTGACCGTTCCCAA              | TCGATAAGCTCCCGAGCAA          |
| 6.    | <i>GH3.1</i>  | <i>AT2G14960</i>         | CCCACAGTGAAAAAAAAACGAGTAA      | CTTGCTGGTGCCTTAGTTTTCTTC     |
| 7.    | <i>EXLA2</i>  | <i>AT4G38400</i>         | ATCACCGTGGTTCCTTTGCT           | GCTTCCAGGTCAGATGCAAGA        |
| 8.    | <i>XTH6</i>   | <i>AT5G65730</i>         | CGGTCACCGCTTTCTACATGA          | CAAGAACTCAAAATCTAGCTCGTCTCT  |
| 9.    | <i>XTH18</i>  | <i>AT4G30280</i>         | TCAAATGAACTTGTCCTGGTAA         | AGTCCCGGAGACTTAAGATAGAATG    |
| 10.   | <i>TCH4</i>   | <i>AT5g57560</i>         | TGCGAAGAGGTTCCCTCAAG           | TCCTCTCTCAACTCTTACTCTCTCTATG |
| 11.   | <i>LAX3</i>   | <i>AT1G77690</i>         | CGGGTTTGTFTAATTTGTTATGTTGA     | TTGGCCTAAGATAGCCATCACA       |
| 12.   | <i>EXP17</i>  | <i>AT4G01630</i>         | GAAGAAGCGGAGGGATGAGA           | CCCTCCTGCTACGTTTGAGATG       |

**Supplemental figure S12.** List of primers used in this study.

## BR regulated genes (303 genes)

| Probe set_ID   | Representative Public ID | 0% Glc + 100 nM BR vs 0% Glc | 3% Glc vs 0% Glc | 3% Glc + 100 nM BR vs 0% Glc |
|----------------|--------------------------|------------------------------|------------------|------------------------------|
| A_84_P12287 8  | AT1G01480                | -2.83                        | 1.67             | -1.04                        |
| A_84_P10559 8  | AT1G01560                | 4.05                         | 8.02             | 5.59                         |
| A_84_P21249 8  | AT1G02650                | 2.19                         | -7.91            | -1.46                        |
| A_84_P801239 A | AT1G02920                | 2.53                         | 4.53             | 5.73                         |
| A_84_P812454 A | AT1G02930                | 2.80                         | 4.12             | 4.90                         |
| A_84_P18950 A  | AT1G04660                | 3.51                         | -1.52            | 1.47                         |
| A_84_P799181 A | AT1G05660                | 2.69                         | 3.75             | 12.70                        |
| A_84_P14703 5  | 1G05835///TC2666         | -2.99                        | -1.55            | -4.56                        |
| A_84_P17191 8  | AT1G07160                | 2.66                         | 10.68            | 17.93                        |
| A_84_P522242   | AT1G07985                | -3.13                        | -1.62            | -5.80                        |
| A_84_P233559   | AT1G10340                | 2.17                         | -9.80            | -6.34                        |
| A_84_P20977 8  | AT1G14480                | 2.04                         | 2.00             | 3.91                         |
| A_84_P16226 8  | AT1G14540                | 2.14                         | 3.86             | 5.06                         |
| A_84_P22847 8  | AT1G14550                | 2.24                         | 12.93            | 6.45                         |
| A_84_P14310 8  | AT1G14720                | -2.07                        | 1.11             | 1.30                         |
| A_84_P12389 8  | AT1G14860                | -3.64                        | -3.65            | -10.03                       |
| A_84_P826352 A | AT1G16750                | -2.14                        | 3.14             | 1.32                         |
| A_84_P516067   | AT1G17345                | -2.31                        | -15.23           | -8.79                        |
| A_84_P23422 8  | AT1G18280                | 2.04                         | -12.08           | -5.01                        |
| A_84_P11448 8  | AT1G18870                | -3.01                        | 7.17             | -2.07                        |
| A_84_P14313 A  | AT1G19970                | 2.08                         | 45.37            | 40.93                        |
| A_84_P16097 8  | AT1G24140                | 10.84                        | 13.42            | 24.87                        |
| A_84_P13252 8  | AT1G24470                | 2.85                         | 1.57             | 5.07                         |
| A_84_P541789 A | AT1G26250                | 2.21                         | -3.37            | -1.95                        |
| A_84_P19294 A  | AT1G26380                | 3.10                         | 41.95            | 40.12                        |
| A_84_P20237 8  | AT1G26420                | 2.74                         | 10.06            | 10.35                        |
| A_84_P12872 8  | AT1G29270                | 2.17                         | -9.86            | -3.80                        |
| A_84_P537376   | AT1G29420                | 2.13                         | -2.32            | 1.30                         |
| A_84_P21517 8  | AT1G31310                | -2.11                        | -1.38            | 1.80                         |
| A_84_P210918   | AT1G32190                | -2.31                        | 1.48             | -1.71                        |
| A_84_P10364 8  | AT1G34050                | 3.61                         | 1.83             | 4.86                         |
| A_84_P20998 A  | AT1G35140                | 2.92                         | -20.48           | -6.43                        |
| A_84_P16055    | 1G35612///TC2596         | -2.04                        | -5.04            | -20.42                       |
| A_84_P13577 8  | AT1G36940                | -2.77                        | -2.21            | -1.33                        |
| A_84_P816739 A | AT1G44970                | -2.67                        | -1.28            | 1.29                         |
| A_84_P268780 A | AT1G45010                | 2.47                         | 11.44            | 9.87                         |
| A_84_P18845 8  | AT1G48000                | -2.37                        | 1.88             | 1.37                         |
| A_84_P13870 8  | AT1G50600                | -15.89                       | -17.12           | -14.48                       |
| A_84_P824506 A | AT1G51680                | -2.05                        | 1.88             | 2.80                         |
| A_84_P276600   | AT1G52910                | 2.00                         | -1.27            | 1.59                         |
| A_84_P10747 8  | AT1G53700                | 2.39                         | 3.58             | 14.54                        |
| A_84_P12484 8  | AT1G58170                | -2.22                        | 10.87            | 1.37                         |
| A_84_P138279   | AT1G58420                | 2.75                         | 3.13             | 11.45                        |
| A_84_P17985 8  | AT1G61170                | 2.36                         | -1.15            | 2.19                         |

|                |           |       |        |        |
|----------------|-----------|-------|--------|--------|
| A_84_P799584,A | AT1G62975 | -2.44 | 2.01   | 2.68   |
| A_84_P251265,A | AT1G63720 | -4.14 | 1.26   | -1.79  |
| A_84_P18119 8  | AT1G64400 | 2.23  | 1.00   | 1.80   |
| A_84_P14255 8  | AT1G64970 | 2.59  | 7.08   | 6.47   |
| A_84_P297064   | AT1G65310 | 4.03  | -1.17  | 8.39   |
| A_84_P11417 8  | AT1G65730 | -2.05 | -3.33  | -7.36  |
| A_84_P13393 8  | AT1G66090 | 3.16  | 9.50   | 10.06  |
| A_84_P842079   | AT1G67195 | 2.55  | 10.13  | 20.48  |
| A_84_P184384   | AT1G68440 | 2.00  | -2.54  | -1.88  |
| A_84_P560506   | AT1G69430 | 2.55  | 4.44   | 14.03  |
| A_84_P20854 8  | AT1G70300 | -2.11 | -1.01  | -1.11  |
| A_84_P11184 8  | AT1G72240 | 2.45  | 1.50   | -2.01  |
| A_84_P157715   | AT1G72930 | 2.74  | 20.54  | 26.13  |
| A_84_P16209 8  | AT1G74110 | 4.31  | -1.00  | 2.41   |
| A_84_P14468 8  | AT1G75450 | -2.79 | -3.05  | -3.22  |
| A_84_P805374,A | AT1G76160 | 2.62  | -4.95  | -1.33  |
| A_84_P260340   | AT1G76240 | -4.42 | -10.27 | -4.71  |
| A_84_P21869 8  | AT1G77690 | -3.17 | 1.63   | 1.63   |
| A_84_P268090,A | AT2G01300 | 2.33  | -1.50  | 1.01   |
| A_84_P258420   | AT2G04500 | 3.63  | -5.10  | -2.12  |
| A_84_P20150 8  | AT2G04550 | -7.04 | -18.33 | -9.28  |
| A_84_P601261   | AT2G07140 | 2.15  | -7.42  | -3.08  |
| A_84_P13475 8  | AT2G11810 | 3.74  | 2.05   | 2.00   |
| A_84_P15343 8  | AT2G14960 | 8.03  | -1.06  | 1.70   |
| A_84_P61660 8  | AT2G15220 | 2.85  | 6.20   | 6.94   |
| A_84_P22914,A  | AT2G15490 | -2.09 | 23.93  | 10.61  |
| A_84_P16321 8  | AT2G20420 | -2.17 | 1.49   | 1.95   |
| A_84_P10627 8  | AT2G20880 | 5.02  | -3.87  | -2.10  |
| A_84_P221516,A | AT2G21900 | 2.17  | -4.13  | -1.71  |
| A_84_P51530 8  | AT2G22470 | 2.91  | 6.51   | 4.77   |
| A_84_P16316 8  | AT2G23180 | -2.21 | 2.47   | 2.98   |
| A_84_P16369 8  | AT2G23380 | 3.14  | 4.26   | 8.05   |
| A_84_P15423 8  | AT2G23620 | -2.05 | -9.34  | -24.54 |
| A_84_P22001 8  | AT2G24710 | -2.15 | -13.67 | -5.67  |
| A_84_P558814   | AT2G25780 | -2.78 | -10.71 | -4.45  |
| A_84_P19231 8  | AT2G26150 | 3.66  | 75.17  | 91.66  |
| A_84_P10647 8  | AT2G26480 | 6.77  | 6.60   | 5.05   |
| A_84_P14435 8  | AT2G26710 | 2.22  | -3.39  | -3.67  |
| A_84_P546443   | AT2G28085 | 3.22  | -1.75  | 1.37   |
| A_84_P12547 8  | AT2G30750 | 2.19  | 32.94  | 11.97  |
| A_84_P207798   | AT2G31540 | 2.42  | 1.03   | 4.67   |
| A_84_P14433 8  | AT2G32990 | -2.59 | 7.39   | 4.70   |
| A_84_P180484   | AT2G33570 | 2.06  | 1.52   | 3.59   |
| A_84_P14490 8  | AT2G34180 | 8.77  | -7.00  | -2.00  |
| A_84_P11613 8  | AT2G34930 | 3.37  | 1.85   | 10.71  |
| A_84_P23919 8  | AT2G35980 | 2.40  | 17.21  | 10.99  |
| A_84_P74914 8  | AT2G36840 | 2.26  | 2.23   | 3.36   |
| A_84_P13527 8  | AT2G37030 | -4.60 | -5.16  | 5.32   |

|                |           |       |        |        |
|----------------|-----------|-------|--------|--------|
| A_84_P13482 8  | AT2G38760 | 2.08  | 3.63   | -4.93  |
| A_84_P14494 8  | AT2G39430 | -2.23 | -2.19  | -14.69 |
| A_84_P14479 8  | AT2G40250 | 7.20  | -1.16  | 2.52   |
| A_84_P22053,A  | AT2G41100 | 2.68  | -4.04  | -6.85  |
| A_84_P53570 8  | AT2G41810 | -2.10 | 1.30   | 3.77   |
| A_84_P248025   | AT2G42800 | -3.15 | 5.44   | 7.69   |
| A_84_P81529,A  | AT2G43060 | -2.38 | 1.20   | -1.49  |
| A_84_P21007 8  | AT2G43570 | 2.99  | 7.91   | 5.29   |
| A_84_P16277,A  | AT2G43610 | 2.40  | 1.14   | -1.68  |
| A_84_P757973   | AT2G44578 | 2.59  | 12.05  | 15.42  |
| A_84_P17343 8  | AT2G44840 | 7.30  | 1.99   | 3.98   |
| A_84_P786490,A | AT2G46400 | 4.23  | 2.63   | 5.39   |
| A_84_P186814   | AT2G46495 | 2.17  | 8.66   | 6.12   |
| A_84_P579358   | AT3G01516 | -9.47 | -6.32  | -6.85  |
| A_84_P11694,A  | AT3G01830 | 3.38  | 6.39   | 9.64   |
| A_84_P15464 8  | AT3G03670 | 2.32  | -27.10 | -7.54  |
| A_84_P21159 8  | AT3G04010 | -3.75 | 1.90   | 1.07   |
| A_84_P90109 8  | AT3G05800 | 2.53  | 1.49   | 4.42   |
| A_84_P280900,A | AT3G07350 | -2.10 | -32.87 | -22.74 |
| A_84_P19256 8  | AT3G09220 | -2.29 | -9.86  | -20.91 |
| A_84_P762751   | AT3G10986 | 2.02  | 2.10   | 5.23   |
| A_84_P536803   | AT3G11550 | -2.16 | -1.14  | -1.18  |
| A_84_P10829 8  | AT3G13730 | -6.01 | 2.47   | 1.15   |
| A_84_P842922,A | AT3G13980 | -3.46 | -2.46  | -7.29  |
| A_84_P15501 8  | AT3G15370 | 4.19  | -8.23  | -1.26  |
| A_84_P805073   | AT3G15450 | 2.34  | -38.08 | -47.79 |
| A_84_P14556 8  | AT3G15540 | 2.75  | -1.22  | 2.26   |
| A_84_P11727 8  | AT3G15670 | 2.67  | 10.47  | 26.81  |
| A_84_P178324   | AT3G18710 | -7.04 | 1.69   | 1.42   |
| A_84_P81479 8  | AT3G19380 | -3.83 | 1.20   | -1.29  |
| A_84_P841540,A | AT3G20830 | -2.36 | -2.90  | -4.69  |
| A_84_P591926   | AT3G21680 | 3.16  | 6.13   | 13.44  |
| A_84_P23101 8  | AT3G21890 | 2.70  | 4.67   | 2.50   |
| A_84_P23070 8  | AT3G22740 | -2.13 | -23.15 | -18.79 |
| A_84_P15503,A  | AT3G22830 | 2.35  | 24.77  | 2.76   |
| A_84_P860303,A | AT3G23170 | -2.56 | 3.70   | 2.18   |
| A_84_P10788 8  | AT3G25900 | 2.48  | -1.91  | 1.15   |
| A_84_P247395   | AT3G26470 | 2.05  | 4.10   | 4.50   |
| A_84_P12704,A  | AT3G27200 | -2.16 | 2.50   | 3.00   |
| A_84_P759661   | AT3G27500 | 2.24  | -4.89  | 1.45   |
| A_84_P22181 8  | AT3G28210 | 2.21  | 23.22  | 25.81  |
| A_84_P100746   | AT3G28220 | -2.37 | -5.70  | -5.18  |
| A_84_P12725 8  | AT3G28510 | 2.04  | 19.37  | 21.18  |
| A_84_P826388,A | AT3G30180 | -4.26 | -2.54  | -1.95  |
| A_84_P19357 8  | AT3G44990 | 2.10  | 1.80   | -4.27  |
| A_84_P18416 8  | AT3G46080 | 3.36  | 12.33  | 18.44  |
| A_84_P19362 8  | AT3G46090 | 3.94  | 2.55   | 7.08   |
| A_84_P12747 8  | AT3G46700 | -2.37 | -12.45 | -16.41 |



|                |           |        |        |        |
|----------------|-----------|--------|--------|--------|
| A_84_P22215 8  | AT3G49630 | -3.12  | -1.35  | -1.54  |
| A_84_P192624   | AT3G49840 | 2.49   | 2.33   | 4.26   |
| A_84_P13706 8  | AT3G50140 | 2.16   | -3.67  | -1.66  |
| A_84_P24110 8  | AT3G50270 | 2.12   | -2.49  | -2.52  |
| A_84_P12763 8  | AT3G50560 | 2.21   | -19.43 | -5.61  |
| A_84_P869611,A | AT3G50660 | -8.48  | -1.18  | -7.55  |
| A_84_P157735   | AT3G51400 | -11.97 | -5.48  | -18.10 |
| A_84_P13719 8  | AT3G53150 | 2.13   | 1.82   | -1.20  |
| A_84_P807670   | AT3G53990 | 2.07   | 1.28   | -10.47 |
| A_84_P813219,A | AT3G54810 | 2.04   | 2.64   | 4.90   |
| A_84_P522715   | AT3G54830 | 2.48   | -1.60  | 1.90   |
| A_84_P821534   | AT3G55010 | 3.02   | 5.94   | 9.34   |
| A_84_P14678 8  | AT3G56000 | 2.17   | -10.06 | -4.44  |
| A_84_P849984,A | AT3G56080 | 2.08   | 9.90   | 10.44  |
| A_84_P16571 8  | AT3G56400 | 2.48   | -3.09  | -1.95  |
| A_84_P861025,A | AT3G56910 | -2.14  | -2.93  | -6.59  |
| A_84_P14682 8  | AT3G57010 | -3.87  | 38.95  | 22.51  |
| A_84_P20359 8  | AT3G57540 | -2.11  | 4.48   | 3.88   |
| A_84_P15632 8  | AT3G58390 | 2.21   | 1.17   | 2.88   |
| A_84_P18473 8  | AT3G59140 | 2.36   | 11.40  | 11.98  |
| A_84_P22262 8  | AT3G60390 | -2.30  | -1.19  | -3.14  |
| A_84_P556409   | AT3G60650 | 3.84   | -3.04  | -1.26  |
| A_84_P173361   | AT3G62570 | 2.29   | -3.84  | -1.97  |
| A_84_P20381 8  | AT3G63110 | -2.27  | 5.70   | 4.69   |
| A_84_P14717 8  | AT4G01630 | 10.87  | 32.65  | 99.38  |
| A_84_P93489,A  | AT4G01670 | -2.03  | -1.17  | -1.53  |
| A_84_P16609,A  | AT4G01870 | -5.15  | 2.09   | -5.65  |
| A_84_P10949 8  | AT4G05100 | -2.06  | 2.07   | -2.37  |
| A_84_P22299 8  | AT4G07960 | 3.12   | -2.60  | 1.01   |
| A_84_P10014 8  | AT4G10160 | 2.25   | -9.61  | -6.59  |
| A_84_P20416 8  | AT4G10350 | 2.33   | 1.53   | 32.51  |
| A_84_P13799 8  | AT4G11230 | 2.34   | -1.67  | 1.92   |
| A_84_P827321,A | AT4G11890 | 2.23   | -1.07  | 2.47   |
| A_84_P14749 8  | AT4G12430 | 2.45   | 1.99   | -2.23  |
| A_84_P763492,A | AT4G12510 | -2.43  | -1.24  | 1.96   |
| A_84_P813874,A | AT4G12720 | 2.87   | 1.33   | -2.17  |
| A_84_P855052,A | AT4G14130 | -4.04  | -3.29  | -49.79 |
| A_84_P596516   | AT4G14450 | -2.46  | 3.57   | 2.27   |
| A_84_P10124 8  | AT4G14560 | -2.67  | -3.41  | -16.52 |
| A_84_P12960 8  | AT4G14630 | 2.20   | -3.61  | -1.86  |
| A_84_P576905,A | AT4G16515 | 2.12   | -3.09  | 1.56   |
| A_84_P10131 8  | AT4G16690 | -2.26  | -22.66 | -17.10 |
| A_84_P17597 8  | AT4G18880 | 2.62   | 7.74   | 11.60  |
| A_84_P11926 8  | AT4G19380 | -4.19  | -18.03 | -3.78  |
| A_84_P765234   | AT4G21745 | 2.16   | -13.72 | -2.46  |
| A_84_P812152,A | AT4G21850 | 2.46   | -2.08  | -1.11  |
| A_84_P534335   | AT4G21970 | 2.74   | -7.44  | -3.83  |
| A_84_P17611 8  | AT4G22460 | -3.71  | -3.42  | -1.59  |

|                |           |        |        |        |
|----------------|-----------|--------|--------|--------|
| A_84_P18557 8  | AT4G22470 | -2.70  | 2.14   | 1.09   |
| A_84_P14776 8  | AT4G23180 | 2.07   | 2.21   | 4.29   |
| A_84_P528136,A | AT4G23190 | 2.09   | 3.83   | 3.61   |
| A_84_P11953 8  | AT4G25780 | -3.14  | -1.88  | -2.84  |
| A_84_P15734 8  | AT4G25810 | 2.80   | -3.57  | -1.32  |
| A_84_P20466 8  | AT4G26260 | 2.77   | -33.86 | -10.48 |
| A_84_P785948,A | AT4G26320 | 2.22   | -6.09  | -2.31  |
| A_84_P823127,A | AT4G27050 | -2.08  | -2.20  | -11.95 |
| A_84_P15741 8  | AT4G27280 | 2.49   | -1.31  | 2.07   |
| A_84_P564464,A | AT4G27460 | 2.10   | -4.13  | -1.80  |
| A_84_P606349   | AT4G28460 | 2.74   | 6.26   | 4.69   |
| A_84_P825877,A | AT4G28650 | 2.91   | 3.03   | 9.11   |
| A_84_P824302,A | AT4G29310 | 2.52   | -1.95  | 2.00   |
| A_84_P19534 8  | AT4G29340 | 2.22   | 4.04   | 3.89   |
| A_84_P79989 8  | AT4G29520 | 3.43   | 7.41   | 15.46  |
| A_84_P212828   | AT4G30280 | 2.39   | -3.32  | 1.02   |
| A_84_P10083 8  | AT4G30290 | 3.19   | 2.50   | 35.89  |
| A_84_P14814 8  | AT4G31470 | 4.39   | 4.82   | 29.48  |
| A_84_P18604 8  | AT4G33020 | -2.16  | 2.34   | 1.99   |
| A_84_P22388 8  | AT4G33070 | -2.16  | 17.22  | 15.20  |
| A_84_P853187,A | AT4G34150 | 2.03   | 1.93   | 4.42   |
| A_84_P10101,A  | AT4G34610 | -2.07  | 3.65   | 4.41   |
| A_84_P537048,A | AT4G36105 | 8.73   | -1.28  | 1.94   |
| A_84_P12944,A  | AT4G36110 | 3.89   | -3.21  | 2.18   |
| A_84_P162603   | AT4G36780 | -2.38  | -1.30  | -18.27 |
| A_84_P159605,A | AT4G37070 | -2.68  | -3.81  | -2.57  |
| A_84_P765161   | AT4G37608 | -2.09  | 2.24   | 3.35   |
| A_84_P16729 8  | AT4G37770 | 3.46   | -1.06  | 4.19   |
| A_84_P10114 8  | AT4G38400 | 2.58   | -10.13 | -3.35  |
| A_84_P12005 8  | AT4G38410 | 2.77   | 1.69   | 9.57   |
| A_84_P12950,A  | AT4G38420 | 2.59   | 1.48   | 2.09   |
| A_84_P810008   | AT4G39330 | 2.12   | 10.37  | 17.00  |
| A_84_P12011 8  | AT4G39800 | -4.38  | 7.27   | 4.67   |
| A_84_P12956 8  | AT4G39830 | 2.66   | -1.29  | 3.15   |
| A_84_P765351   | AT4G40011 | 2.05   | 1.66   | 22.08  |
| A_84_P586802   | AT5G01015 | 5.09   | -1.19  | 2.27   |
| A_84_P23380 8  | AT5G01540 | 3.30   | 5.35   | 13.06  |
| A_84_P10141 8  | AT5G01550 | 3.22   | 6.50   | 20.39  |
| A_84_P22435 8  | AT5G01740 | -66.18 | -2.81  | -17.23 |
| A_84_P506004   | AT5G01790 | 2.21   | 13.35  | 16.49  |
| A_84_P70894 8  | AT5G01840 | -2.78  | 2.75   | 1.59   |
| A_84_P556555   | AT5G02490 | 3.10   | 5.86   | 9.32   |
| A_84_P103716   | AT5G03350 | 2.79   | -3.53  | 1.02   |
| A_84_P19609 8  | AT5G05390 | 2.52   | 3.96   | 6.49   |
| A_84_P575222   | AT5G09800 | -2.82  | 7.17   | 7.52   |
| A_84_P18678 8  | AT5G09870 | 2.11   | 2.92   | 5.72   |
| A_84_P18683 8  | AT5G10970 | 2.53   | 7.76   | 9.74   |
| A_84_P524680,A | AT5G13220 | 2.07   | -2.59  | -1.16  |

|                |           |        |        |        |
|----------------|-----------|--------|--------|--------|
| A_84_P829727,A | AT5G13320 | 6.22   | -1.18  | 1.79   |
| A_84_P14907 8  | AT5G13700 | -2.16  | 2.09   | -1.35  |
| A_84_P18691,A  | AT5G13740 | -2.20  | -4.96  | -50.86 |
| A_84_P19794 8  | AT5G14750 | 2.93   | 3.09   | 9.02   |
| A_84_P226699   | AT5G15050 | 2.16   | 5.72   | 11.93  |
| A_84_P17749 8  | AT5G15120 | 2.15   | 1.01   | -10.63 |
| A_84_P22481 8  | AT5G16590 | 2.27   | -1.95  | 1.58   |
| A_84_P20748 8  | AT5G17520 | -2.03  | 3.27   | 2.99   |
| A_84_P16807 8  | AT5G17760 | -2.01  | 4.79   | 1.80   |
| A_84_P20594 8  | AT5G18560 | -9.13  | 1.07   | -3.07  |
| A_84_P13031 8  | AT5G19110 | 4.51   | -2.77  | -1.80  |
| A_84_P92929,A  | AT5G19240 | 2.70   | 4.18   | 10.61  |
| A_84_P223799   | AT5G22100 | -3.16  | 3.01   | 4.22   |
| A_84_P243945   | AT5G22580 | -14.18 | 1.38   | -1.89  |
| A_84_P174931   | AT5G22940 | 2.14   | -2.77  | -1.20  |
| A_84_P13987 8  | AT5G25190 | 2.87   | 3.07   | 19.10  |
| A_84_P825802,A | AT5G25250 | 2.93   | 2.20   | 3.20   |
| A_84_P826308   | AT5G25820 | 3.18   | 7.69   | 8.44   |
| A_84_P258360   | AT5G26290 | -2.97  | 8.19   | 5.75   |
| A_84_P515865   | AT5G26690 | 2.47   | -6.63  | -1.38  |
| A_84_P16971,A  | AT5G28840 | -2.10  | -4.30  | -14.55 |
| A_84_P848499   | AT5G35935 | -2.32  | 1.21   | -5.06  |
| A_84_P20622 8  | AT5G36260 | 3.31   | 1.65   | 5.91   |
| A_84_P18737 8  | AT5G38710 | 5.65   | -10.48 | -14.44 |
| A_84_P20630 8  | AT5G38970 | -14.60 | -1.44  | -4.69  |
| A_84_P16848,A  | AT5G39580 | 2.05   | -2.19  | -1.39  |
| A_84_P612712   | AT5G41300 | 2.12   | -9.08  | -3.77  |
| A_84_P23478,A  | AT5G41750 | 5.86   | 7.00   | 9.52   |
| A_84_P769417   | AT5G41761 | -2.19  | -10.28 | -3.07  |
| A_84_P13077,A  | AT5G42380 | 3.98   | 10.22  | 15.09  |
| A_84_P14969 8  | AT5G43030 | 2.19   | -3.86  | -1.45  |
| A_84_P511454   | AT5G43570 | -2.67  | -15.35 | -24.80 |
| A_84_P19706 8  | AT5G45000 | 2.32   | 1.55   | 2.39   |
| A_84_P17815 8  | AT5G45200 | 3.38   | 2.48   | 6.84   |
| A_84_P22546,A  | AT5G45670 | 2.86   | 1.42   | 5.09   |
| A_84_P20664 8  | AT5G48010 | -2.10  | 42.14  | 34.73  |
| A_84_P139909   | AT5G49100 | -2.48  | 2.01   | 1.98   |
| A_84_P199394,A | AT5G49900 | -2.30  | -1.39  | -1.87  |
| A_84_P220678   | AT5G50590 | 2.09   | -13.22 | -5.48  |
| A_84_P296724,A | AT5G51190 | 2.21   | -1.54  | 1.03   |
| A_84_P15946 8  | AT5G51440 | 2.64   | 37.76  | 3.92   |
| A_84_P21622 8  | AT5G51480 | 6.00   | -1.61  | 1.50   |
| A_84_P302000   | AT5G53250 | 2.01   | -14.19 | -15.03 |
| A_84_P262520   | AT5G55620 | -2.31  | 10.48  | 24.24  |
| A_84_P12181,A  | AT5G56000 | 2.44   | 11.34  | 12.58  |
| A_84_P13130 8  | AT5G57220 | 2.25   | 12.62  | 5.10   |
| A_84_P17859 8  | AT5G57560 | 3.36   | -12.77 | -15.49 |
| A_84_P828057,A | AT5G57780 | -5.80  | -3.43  | -3.84  |

|                |           |        |         |        |
|----------------|-----------|--------|---------|--------|
| A_84_P559359   | AT5G57785 | -10.18 | -5.77   | -53.15 |
| A_84_P604788   | AT5G59510 | -2.25  | 1.91    | 2.37   |
| A_84_P17872 8  | AT5G60520 | 2.20   | 6.83    | 17.10  |
| A_84_P530135,A | AT5G60880 | 2.21   | 4.02    | 9.49   |
| A_84_P15043 8  | AT5G62340 | 2.62   | -2.29   | -1.00  |
| A_84_P20724,A  | AT5G63790 | -2.31  | 4.19    | 1.48   |
| A_84_P161403   | AT5G63820 | 2.88   | -7.16   | -1.22  |
| A_84_P800757,A | AT5G64260 | -2.76  | -2.57   | -7.66  |
| A_84_P173491   | AT5G64770 | 3.85   | -1.19   | 5.25   |
| A_84_P12218 8  | AT5G64870 | 2.42   | -1.02   | 2.04   |
| A_84_P160863   | AT5G64980 | 2.16   | 8.40    | 9.25   |
| A_84_P555846   | AT5G65030 | -2.77  | 8.50    | 5.12   |
| A_84_P60290 8  | AT5G65300 | -6.54  | 2.62    | -1.17  |
| A_84_P16948 8  | AT5G65730 | -2.02  | -110.66 | -36.27 |
| A_84_P23570 8  | AT5G65800 | 4.67   | 1.29    | 7.77   |
| A_84_P23571 8  | AT5G66080 | -7.36  | 1.30    | -2.06  |
| A_84_P10332 8  | AT5G66110 | -2.06  | -12.06  | -9.16  |
| A_84_P16006 8  | AT5G66590 | -2.57  | -1.05   | -17.07 |
| A_84_P546117   | AT5G66985 | -2.06  | 7.44    | 3.50   |

| Gene Description                           | Gene Symbol  |
|--------------------------------------------|--------------|
| 1-aminocyclopropane-1-carboxylate          | ACS2         |
| mitogen-activated protein kinase,          | MPK11        |
| DNAJ heat shock N-terminal domain-         |              |
| GLUTATHIONE S-TRANSFERASE 7;               | GSTF7        |
| ARABIDOPSIS THALIANA GLUATIONE S-          | GSTF6        |
| Arabidopsis thaliana glycine-rich protein  |              |
| Arabidopsis thaliana Pectin lyase-like     |              |
| similar to unknown protein [Arabidopsis    |              |
| protein phosphatase 2C, putative / PP2C,   |              |
| Expressed protein [At1g07985.1]            |              |
| ankyrin repeat family protein contains     |              |
| ankyrin repeat family protein contains     |              |
| anionic peroxidase, putative similar to    | PER4         |
| anionic peroxidase, putative similar to    |              |
| xyloglucan:xyloglucosyl transferase /      | XTR2         |
| MutT/nudix family protein low similarity   | NUDT18       |
| Arabidopsis thaliana uncharacterized       |              |
| auxin-responsive protein-related similar   |              |
| protease inhibitor/seed storage/lipid      |              |
| isochorismate synthase, putative /         | ATICS2       |
| Arabidopsis thaliana ER lumen protein      |              |
| matrixin family protein similar to matrix  |              |
| short-chain dehydrogenase/reductase        | ATKCR2;BETA- |
| Arabidopsis thaliana Proline-rich          |              |
| Arabidopsis thaliana FAD-binding and       |              |
| FAD-binding domain-containing protein      |              |
| expressed protein [At1g29270.1]            |              |
| auxin-responsive family protein Similar    |              |
| hydroxyproline-rich glycoprotein family    |              |
| expressed protein [At1g32190.1]            |              |
| ankyrin repeat family protein contains     |              |
| PHI-1 (PHOSPHATE-INDUCED 1)                | PHI-1        |
| Q9LQF9 (Q9LQF9) F15O4.26, complete         |              |
| hypothetical protein [At1g36940.1]         |              |
| Arabidopsis thaliana peroxidase 9          |              |
| Arabidopsis thaliana TRAM, LAG1 and        |              |
| myb family transcription factor similar to | MYB112       |
| scarecrow-like transcription factor 5      | SCL5         |
| 4CL1 (4-COUMARATE:COA LIGASE 1); 4-        | 4CL1         |
| expressed protein [At1g52910.1]            |              |
| protein kinase, putative similar to        | WAG1         |
| disease resistance-responsive protein-     |              |
| expressed protein [At1g58420.1]            |              |
| expressed protein [At1g61170.1]            |              |

upregulated

|                                                                                                                        |                       |
|------------------------------------------------------------------------------------------------------------------------|-----------------------|
| Arabidopsis thaliana transcription factor                                                                              |                       |
| Arabidopsis thaliana uncharacterized                                                                                   |                       |
| long-chain-fatty-acid--CoA ligase,<br>expressed protein [At1g64970.1];                                                 | LACS3<br>G-TMT        |
| xyloglucan:xyloglucosyl transferase,                                                                                   | XTH17                 |
| oligopeptide transporter OPT family                                                                                    | YSL7                  |
| disease resistance protein (TIR-NBS<br>MIR414                                                                          | MIR414                |
| expressed protein [At1g68440.1]                                                                                        |                       |
| hypothetical protein [At1g69430.1]                                                                                     |                       |
| potassium transporter, putative similar<br>expressed protein [At1g72240.1]                                             | KUP6                  |
| Toll-Interleukin-Resistance (TIR) domain-<br>cytochrome P450 family protein similar                                    | TIR<br>CYP78A10       |
| FAD-binding domain-containing protein /<br>SKS5 (SKU5 Similar 5); copper ion binding                                   | CKX5<br>sks5          |
| expressed protein contains Pfam profile                                                                                |                       |
| amino acid permease, putative similar to<br>Arabidopsis thaliana uncharacterized                                       | LAX3                  |
| DC1 domain-containing protein contains                                                                                 |                       |
| dual specificity protein phosphatase 1E;<br>F-box family protein contains                                              | DSPTP1E; IBR5         |
| 1,2-diacylglycerol 3-beta-                                                                                             | MONOGALACT            |
| auxin-responsive GH3 family protein                                                                                    | GH3.1                 |
| secretory protein, putative similar to<br>UGT73B4; UDP-glycosyltransferase/<br>succinyl-CoA ligase [GDP-forming] beta- | UGT73B4               |
| AP2 domain-containing transcription<br>WRKY59 (WRKY DNA-binding protein 59);                                           | ATERF53;ERF<br>WRKY59 |
| arabinogalactan-protein (AGP2) identical                                                                               | AGP2                  |
| cytochrome P450, putative                                                                                              | CYP96A1               |
| curly leaf protein (CURLY LEAF) /<br>esterase, putative similar to ethylene-                                           | CLF<br>MES1           |
| glutamate receptor family protein                                                                                      | GLR2.3                |
| hypothetical protein [At2g25780.1]                                                                                     |                       |
| HEAT SHOCK TRANSCRIPTION FACTOR                                                                                        | ATHSFA2               |
| UDP-glucuronosyl/UDP-glucosyl<br>cytochrome P450, putative                                                             | UDP-GLUCOSYL<br>PHYB  |
| auxin-responsive family protein similar                                                                                |                       |
| cytochrome P450 71A12, putative                                                                                        | CYP71A12              |
| GDSL-motif lipase/hydrolase family                                                                                     |                       |
| glycosyl hydrolase family 9 protein                                                                                    | GH9B8                 |
| expressed protein [At2g33570.1]                                                                                        |                       |
| CBL-interacting protein kinase 13                                                                                      | CIPK13;               |
| disease resistance family protein                                                                                      |                       |
| harpin-induced family protein (YLS9) /<br>ACT domain-containing protein contains                                       | YLS9<br>ACR10         |
| auxin-responsive family protein similar                                                                                |                       |

|                                                                          |              |
|--------------------------------------------------------------------------|--------------|
| annexin 3 (ANN3) nearly identical to                                     | ANN3         |
| disease resistance-responsive protein-GDSL-motif lipase/hydrolase family |              |
| TCH3 (TOUCH 3)                                                           | TCH3         |
| expressed protein contains Pfam profile                                  |              |
| leucine-rich repeat family protein                                       | RLP29        |
| transcription factor                                                     | IBH1         |
| chitinase, putative similar to chitinase                                 |              |
| Arabidopsis thaliana putative chitinase                                  |              |
| Arabidopsis thaliana RING/U-box domain-                                  |              |
| ethylene-responsive element-binding                                      | EREBP; ERF13 |
| WRKY46 (WRKY DNA-binding protein                                         | WRKY46       |
| zinc finger (C3HC4-type RING finger)                                     |              |
| expressed protein [At3g01516.1]                                          |              |
| Arabidopsis thaliana putative calcium-peroxidase, putative similar to    |              |
| glycosyl hydrolase family 17 protein                                     |              |
| ACTIVATION-TAGGED BRI1 SUPPRESSOR                                        | ATBS1; AIF1  |
| Arabidopsis thaliana uncharacterized                                     |              |
| laccase family protein / diphenol oxidase                                | LAC7         |
| Arabidopsis thaliana LURP-one-like                                       |              |
| CASPARIAN STRIP MEMBRANE DOMAIN                                          | CASP2        |
| cytochrome P450, putative similar to                                     | CYP90D1      |
| Arabidopsis thaliana uncharacterized                                     |              |
| expansin, putative (EXP12) similar to                                    | ATEXPA12;    |
| similar to unknown protein [Arabidopsis                                  |              |
| auxin-responsive protein / indoleacetic                                  | MSG2; IAA19  |
| late embryogenesis abundant protein,                                     |              |
| U-box domain-containing protein similar                                  | PUB29        |
| U-box domain-containing protein                                          | PUB25        |
| Arabidopsis thaliana AGC (cAMP-expressed protein [At3g21680.1]           |              |
| zinc finger (B-box type) family protein                                  |              |
| homocysteine S-methyltransferase 3                                       | HMT3         |
| AT-HSFA6B (Arabidopsis thaliana heat                                     | HSFA6B       |
| Arabidopsis thaliana uncharacterized                                     |              |
| homocysteine S-methyltransferase 1                                       | HMT-1        |
| expressed protein [At3g26470.1]                                          |              |
| Arabidopsis thaliana plastocyanin-like                                   |              |
| Arabidopsis thaliana cysteine/histidine-                                 |              |
| zinc finger (AN1-like) family protein                                    | SAP12; PMZ   |
| mepirin and TRAF homology domain-                                        |              |
| AAA-type ATPase family protein contains                                  |              |
| BR6OX2/CYP85A2 (BRASSINOSTEROID-6-                                       | BR6OX2       |
| xyloglucan:xyloglucosyl transferase,                                     | XTR8         |
| zinc finger (C2H2 type) family protein                                   |              |
| zinc finger (C2H2 type) family protein                                   | ZAT7         |
| UDP-glucuronosyl/UDP-glucosyl                                            |              |



|                                            |              |
|--------------------------------------------|--------------|
| 2-oxoacid-dependent oxidase, putative      |              |
| proline-rich family protein contains       |              |
| expressed protein contains Pfam profile    |              |
| transferase family protein similar to      |              |
| short-chain dehydrogenase/reductase        |              |
| CYTOCHROME P450 90B1; DWARF                | DWF4;        |
| expressed protein contains Pfam profile    |              |
| UDP-glucuronosyl/UDP-glucosyl              | UDP-GLUCOSYL |
| universal stress protein (USP) family      |              |
| BME3/BME3-ZF (BLUE MICROPYLAR              | BME3         |
| amino acid transporter family protein      |              |
| ATPURM/PUR5;                               | EMBRYO       |
| glycosyl transferase family 2 protein      | CSLA14       |
| Arabidopsis thaliana At3g56080 mRNA        |              |
| WRKY family transcription factor DNA-      | WRKY70       |
| PSRP5 (PLASTID-SPECIFIC 50S                | PSRP5        |
| strictosidine synthase family protein      |              |
| remorin family protein contains Pfam       |              |
| eukaryotic release factor 1 family protein |              |
| ABC transporter family protein putative    | MRP14        |
| homeobox-leucine zipper protein 3          | HAT3         |
| expressed protein [At3g60650.1]            |              |
| DNAJ heat shock N-terminal domain-         |              |
| adenylate isopentenyltransferase 3 /       | IPT3         |
| expansin, putative (EXP17) similar to      | ATEXP17;     |
| Arabidopsis thaliana uncharacterized       |              |
| Arabidopsis thaliana tolB-related protein  |              |
| myb family transcription factor (MYB74)    | MYB74        |
| glycosyl transferase family 2 protein      | CSLC12       |
| zinc finger (C3HC4-type RING finger)       |              |
| no apical meristem (NAM) family protein    | ANAC070      |
| respiratory burst oxidase, putative /      |              |
| ABA- AND OSMOTIC-STRESS-INDUCIBLE          | ARCK1        |
| trehalose-6-phosphate phosphatase,         | TPPF         |
| Arabidopsis thaliana bifunctional          |              |
| AtNUDT7 (ARABIDOPSIS THALIANA              | NUDT7        |
| XTR7 (XYLOGLUCAN                           | XTH15        |
| expressed protein [At4g14450.1]            |              |
| auxin-responsive protein / indoleacetic    | IAA1; AXR5   |
| germin-like protein (GLP9) identical to    | GLP9         |
| unknown protein;GOLVEN 1; CLE-LIKE 6;      | RGF6         |
| esterase/lipase/thioesterase family        | MES16        |
| heat shock transcription factor 21         | HSF A4A      |
| alcohol oxidase-related similar to long    |              |
| Arabidopsis thaliana PAK-box/P21-Rho-      |              |
| methionine sulfoxide reductase domain-     | MSRB9        |
| expressed protein contains Pfam profile    |              |
| protease inhibitor/seed storage/lipid      |              |

|                                            |                |
|--------------------------------------------|----------------|
| protease inhibitor/seed storage/lipid      |                |
| receptor-like protein kinase 4, putative   | RLK4;CYSTEINE- |
| CRK11 (CYSTEINE-RICH RLK11); kinase        | CRK11          |
| pathogenesis-related protein, putative     |                |
| xyloglucan:xyloglucosyl transferase,       |                |
| expressed protein similar to myo-inositol  | CIL            |
| AGP13 (ARABINOGALACTAN PROTEIN             | AGP13          |
| Arabidopsis thaliana F-box protein         |                |
| calcium-binding EF hand family protein     | WES1; GH3.5    |
| Arabidopsis thaliana cystathionine beta-   |                |
| hypothetical protein [At4g28460.1]         |                |
| Arabidopsis thaliana putative leucine-     |                |
| Arabidopsis thaliana uncharacterized       |                |
| profilin 3 (PRO3) (PFN3) identical to      |                |
| expressed protein [At4g29520.1]            | PROFILIN 4     |
| xyloglucan:xyloglucosyl transferase,       |                |
| xyloglucan:xyloglucosyl transferase,       | XTH18          |
| pathogenesis-related protein, putative;    | FLA5           |
| metal transporter, putative (ZIP9)         |                |
| pyruvate decarboxylase, putative strong    | ATZIP9; ZIP9   |
| Arabidopsis thaliana calcium-dependent     |                |
| BLH6 (BELL1-LIKE HOMEODOMAIN 5);           | BLH6           |
| Arabidopsis thaliana uncharacterized       |                |
| Arabidopsis thaliana SAUR-like auxin-      |                |
| brassinosteroid signalling positive        | AtPMT6         |
| PLA IVA/PLP1; nutrient reservoir;          | PLP1; BEH2     |
| Arabidopsis thaliana uncharacterized       |                |
| 1-aminocyclopropane-1-carboxylate          |                |
| expansin family protein (EXPL2) contains   | 1-AMINO-       |
| dehydrin, putative similar to dehydrin     | ATEXLA2;       |
| SKS9 (SKU5 Similar 9); copper ion binding  | sks9           |
| mannitol dehydrogenase, putative;          | CAD9           |
| inositol-3-phosphate synthase isozyme 1    | MIPS1          |
| L-ascorbate oxidase, putative similar to   |                |
| Arabidopsis thaliana uncharacterized       |                |
| expressed protein [At5g01015.1]            |                |
| lectin protein kinase, putative similar to | LECRKA4.1      |
| lectin protein kinase, putative similar to | LECRKA4.2      |
| expressed protein wound-inducible          |                |
| expressed protein [At5g01790.1]            |                |
| ovate family protein 59% similar to ovate  | OFP1           |
| heat shock cognate 70 kDa protein 2        | AtHsp70-2;     |
| legume lectin family protein contains      |                |
| laccase, putative / diphenol oxidase,      | LAC12          |
| U-box domain-containing protein low        |                |
| cellulose synthase, catalytic subunit,     | CESA5          |
| zinc finger (C2H2 type) family protein     |                |
| JAS1/JAZ10/TIFY9 (JASMONATE-ZIM-           | JAZ10          |

|                                                                                      |                     |
|--------------------------------------------------------------------------------------|---------------------|
| PBS3 (AVRPPHB SUSCEPTIBLE 3);                                                        | PBS3                |
| polyamine oxidase, putative similar to                                               | ATPAO1              |
| ZIF1 (ZINC INDUCED FACILITATOR 1);                                                   | ZIF1                |
| myb family transcription factor (MYB66)                                              | ATMYB66             |
| glycosyltransferase family 14 protein /<br>expressed protein [At5g15120.1]           |                     |
| leucine-rich repeat transmembrane                                                    | LRR1                |
| root cap 1 (RCP1) identical to GI:6137138                                            | RCP1                |
| AAA-type ATPase family protein contains                                              |                     |
| AP2 domain-containing transcription                                                  | PUCHI               |
| extracellular dermal glycoprotein-related<br>Arabidopsis thaliana GPI-anchored       |                     |
| RNA cyclase family protein contains<br>expressed protein [At5g22580.1]               |                     |
| exostosin family protein contains Pfam                                               | F8H                 |
| ethylene-responsive element-binding                                                  | ESE3                |
| Arabidopsis thaliana Flotillin-like protein                                          | FLOT1               |
| exostosin family protein                                                             |                     |
| mepirin and TRAF homology domain-<br>heavy-metal-associated domain-                  |                     |
| GDP-D-MANNOSE 3',5'-EPIMERASE; GDP-<br>transposable element gene                     | GME                 |
| aspartyl protease family protein contains                                            |                     |
| proline oxidase, putative / osmotic stress-<br>cytochrome P450, putative similar to  | BR6OX1              |
| Arabidopsis thaliana peroxidase 62                                                   |                     |
| receptor-like protein kinase-related                                                 |                     |
| Arabidopsis thaliana TIR-NBS-LRR class                                               |                     |
| Arabidopsis thaliana uncharacterized                                                 |                     |
| CML37/CML39; calcium ion binding                                                     | CML37               |
| DC1 domain-containing protein contains                                               |                     |
| serine protease inhibitor, potato                                                    |                     |
| Toll-Interleukin-Resistance (TIR) domain-<br>disease resistance protein (TIR-NBS-LRR |                     |
| Arabidopsis thaliana GDSL                                                            |                     |
| pentacyclic triterpene synthase, putative<br>expressed protein [At5g49100.1]         | THAS1               |
| Arabidopsis thaliana Beta-glucosidase,<br>short-chain dehydrogenase/reductase        | AtHSD4              |
| Arabidopsis thaliana ethylene-responsive<br>23.5 kDa mitochondrial small heat shock  |                     |
| multi-copper oxidase type I family                                                   | sks2                |
| arabinogalactan-protein, putative<br>expressed protein similar to unknown            | AGP22               |
| heat shock protein 81-4 (HSP81-4)                                                    | Hsp81.4             |
| cytochrome P450, putative similar to                                                 | CYP81F2             |
| xyloglucan:xyloglucosyl transferase /<br>Arabidopsis thaliana uncharacterized        | XTH22; TCH4<br>P1R1 |

|                                                                  |               |
|------------------------------------------------------------------|---------------|
| expressed protein [At5g57785.1]                                  |               |
| expressed protein [At5g59510.1]; DEVIL                           | DVL18; RTFL5  |
| late embryogenesis abundant protein-unknown protein; BREAKING OF | BASL          |
| invertase/pectin methylesterase                                  |               |
| ANAC102 (Arabidopsis NAC domain                                  | NAC102        |
| expressed protein contains Pfam profile                          |               |
| phosphate-responsive protein, putative;                          | EXL2          |
| expressed protein [At5g64770.1];                                 | GLV2; CLEL 9; |
| expressed protein [At5g64870.1]                                  |               |
| expressed protein [At5g64980.1]                                  |               |
| expressed protein ; expression                                   |               |
| expressed protein [At5g65300.1]                                  |               |
| xyloglucan:xyloglucosyl transferase,                             | XTH6          |
| 1-aminocyclopropane-1-carboxylate                                | ACS5; ETO2;   |
| protein phosphatase 2C family protein /                          |               |
| HEAVY METAL ASSOCIATED                                           | HIPP27        |
| allergen V5/Tpx-1-related family protein                         |               |
| expressed protein [At5g66985.1]                                  |               |

| color key     |           |
|---------------|-----------|
| downregulated | unchanged |

**BR regulated genes up- and down-regulated by Glc alone (217 genes)**

| Probe set_ID | Representative Public ID | 0% Glc + 100 nM BR vs 0% Glc | 3% Glc vs 0% Glc | 3% Glc + 100 nM BR vs 0% Glc | Gene Description  |
|--------------|--------------------------|------------------------------|------------------|------------------------------|-------------------|
| A_84_P10559  | AT1G01560                | 4.05                         | 8.02             | 5.59                         | mitogen-          |
| A_84_P21249  | AT1G02650                | 2.19                         | -7.91            | -1.46                        | DNAJ heat         |
| A_84_P801239 | AT1G02920                | 2.53                         | 4.53             | 5.73                         | GLUTATHIONE       |
| A_84_P812454 | AT1G02930                | 2.80                         | 4.12             | 4.90                         | ARABIDOPSIS       |
| A_84_P799181 | AT1G05660                | 2.69                         | 3.75             | 12.70                        | Arabidopsis       |
| A_84_P17191  | AT1G07160                | 2.66                         | 10.68            | 17.93                        | protein           |
| A_84_P233559 | AT1G10340                | 2.17                         | -9.80            | -6.34                        | ankyrin repeat    |
| A_84_P20977  | AT1G14480                | 2.04                         | 2.00             | 3.91                         | ankyrin repeat    |
| A_84_P16226  | AT1G14540                | 2.14                         | 3.86             | 5.06                         | anionic           |
| A_84_P22847  | AT1G14550                | 2.24                         | 12.93            | 6.45                         | anionic           |
| A_84_P12389  | AT1G14860                | -3.64                        | -3.65            | -10.03                       | MutT/nudix        |
| A_84_P826352 | AT1G16750                | -2.14                        | 3.14             | 1.32                         | Arabidopsis       |
| A_84_P516067 | AT1G17345                | -2.31                        | -15.23           | -8.79                        | auxin-            |
| A_84_P23422  | AT1G18280                | 2.04                         | -12.08           | -5.01                        | protease          |
| A_84_P11448  | AT1G18870                | -3.01                        | 7.17             | -2.07                        | isochorismate     |
| A_84_P14313, | AT1G19970                | 2.08                         | 45.37            | 40.93                        | Arabidopsis       |
| A_84_P16097  | AT1G24140                | 10.84                        | 13.42            | 24.87                        | matrixin family   |
| A_84_P541789 | AT1G26250                | 2.21                         | -3.37            | -1.95                        | Arabidopsis       |
| A_84_P19294, | AT1G26380                | 3.10                         | 41.95            | 40.12                        | Arabidopsis       |
| A_84_P20237  | AT1G26420                | 2.74                         | 10.06            | 10.35                        | FAD-binding       |
| A_84_P12872  | AT1G29270                | 2.17                         | -9.86            | -3.80                        | expressed         |
| A_84_P537376 | AT1G29420                | 2.13                         | -2.32            | 1.30                         | auxin-            |
| A_84_P20998, | AT1G35140                | 2.92                         | -20.48           | -6.43                        | PHI-1             |
| A_84_P16055  | 1G35612///TC2596         | -2.04                        | -5.04            | -20.42                       | Q9LQF9            |
| A_84_P13577  | AT1G36940                | -2.77                        | -2.21            | -1.33                        | hypothetical      |
| A_84_P268780 | AT1G45010                | 2.47                         | 11.44            | 9.87                         | Arabidopsis       |
| A_84_P13870  | AT1G50600                | -15.89                       | -17.12           | -14.48                       | scarecrow-like    |
| A_84_P10747  | AT1G53700                | 2.39                         | 3.58             | 14.54                        | protein kinase,   |
| A_84_P12484  | AT1G58170                | -2.22                        | 10.87            | 1.37                         | disease           |
| A_84_P138279 | AT1G58420                | 2.75                         | 3.13             | 11.45                        | expressed         |
| A_84_P799584 | AT1G62975                | -2.44                        | 2.01             | 2.68                         | Arabidopsis       |
| A_84_P14255  | AT1G64970                | 2.59                         | 7.08             | 6.47                         | expressed         |
| A_84_P11417  | AT1G65730                | -2.05                        | -3.33            | -7.36                        | oligopeptide      |
| A_84_P13393  | AT1G66090                | 3.16                         | 9.50             | 10.06                        | disease           |
| A_84_P842079 | AT1G67195                | 2.55                         | 10.13            | 20.48                        | MIR414            |
| A_84_P184384 | AT1G68440                | 2.00                         | -2.54            | -1.88                        | expressed         |
| A_84_P560506 | AT1G69430                | 2.55                         | 4.44             | 14.03                        | hypothetical      |
| A_84_P157715 | AT1G72930                | 2.74                         | 20.54            | 26.13                        | Toll-Interleukin- |
| A_84_P14468  | AT1G75450                | -2.79                        | -3.05            | -3.22                        | FAD-binding       |
| A_84_P805374 | AT1G76160                | 2.62                         | -4.95            | -1.33                        | SKS5 (SKU5)       |
| A_84_P260340 | AT1G76240                | -4.42                        | -10.27           | -4.71                        | expressed         |
| A_84_P258420 | AT2G04500                | 3.63                         | -5.10            | -2.12                        | DC1 domain-       |

|              |           |       |        |        |                  |
|--------------|-----------|-------|--------|--------|------------------|
| A_84_P20150  | AT2G04550 | -7.04 | -18.33 | -9.28  | dual specificity |
| A_84_P601261 | AT2G07140 | 2.15  | -7.42  | -3.08  | F-box family     |
| A_84_P13475  | AT2G11810 | 3.74  | 2.05   | 2.00   | 1,2-             |
| A_84_P61660  | AT2G15220 | 2.85  | 6.20   | 6.94   | secretory        |
| A_84_P22914, | AT2G15490 | -2.09 | 23.93  | 10.61  | UGT73B4; UDP-    |
| A_84_P10627  | AT2G20880 | 5.02  | -3.87  | -2.10  | AP2 domain-      |
| A_84_P221516 | AT2G21900 | 2.17  | -4.13  | -1.71  | WRKY59 (WRKY     |
| A_84_P51530  | AT2G22470 | 2.91  | 6.51   | 4.77   | arabinogalacta   |
| A_84_P16316  | AT2G23180 | -2.21 | 2.47   | 2.98   | cytochrome       |
| A_84_P16369  | AT2G23380 | 3.14  | 4.26   | 8.05   | curly leaf       |
| A_84_P15423  | AT2G23620 | -2.05 | -9.34  | -24.54 | esterase,        |
| A_84_P22001  | AT2G24710 | -2.15 | -13.67 | -5.67  | glutamate        |
| A_84_P558814 | AT2G25780 | -2.78 | -10.71 | -4.45  | hypothetical     |
| A_84_P19231  | AT2G26150 | 3.66  | 75.17  | 91.66  | HEAT SHOCK       |
| A_84_P10647  | AT2G26480 | 6.77  | 6.60   | 5.05   | UDP-             |
| A_84_P14435  | AT2G26710 | 2.22  | -3.39  | -3.67  | cytochrome       |
| A_84_P12547  | AT2G30750 | 2.19  | 32.94  | 11.97  | cytochrome       |
| A_84_P14433  | AT2G32990 | -2.59 | 7.39   | 4.70   | glycosyl         |
| A_84_P14490  | AT2G34180 | 8.77  | -7.00  | -2.00  | CBL-interacting  |
| A_84_P23919  | AT2G35980 | 2.40  | 17.21  | 10.99  | harpin-induced   |
| A_84_P74914  | AT2G36840 | 2.26  | 2.23   | 3.36   | ACT domain-      |
| A_84_P13527  | AT2G37030 | -4.60 | -5.16  | 5.32   | auxin-           |
| A_84_P13482  | AT2G38760 | 2.08  | 3.63   | -4.93  | annexin 3        |
| A_84_P14494  | AT2G39430 | -2.23 | -2.19  | -14.69 | disease          |
| A_84_P22053, | AT2G41100 | 2.68  | -4.04  | -6.85  | TCH3 (TOUCH      |
| A_84_P248025 | AT2G42800 | -3.15 | 5.44   | 7.69   | leucine-rich     |
| A_84_P21007  | AT2G43570 | 2.99  | 7.91   | 5.29   | chitinase,       |
| A_84_P757973 | AT2G44578 | 2.59  | 12.05  | 15.42  | Arabidopsis      |
| A_84_P786490 | AT2G46400 | 4.23  | 2.63   | 5.39   | WRKY46 (WRKY     |
| A_84_P186814 | AT2G46495 | 2.17  | 8.66   | 6.12   | zinc finger      |
| A_84_P579358 | AT3G01516 | -9.47 | -6.32  | -6.85  | expressed        |
| A_84_P11694, | AT3G01830 | 3.38  | 6.39   | 9.64   | Arabidopsis      |
| A_84_P15464  | AT3G03670 | 2.32  | -27.10 | -7.54  | peroxidase,      |
| A_84_P280900 | AT3G07350 | -2.10 | -32.87 | -22.74 | Arabidopsis      |
| A_84_P19256  | AT3G09220 | -2.29 | -9.86  | -20.91 | laccase family   |
| A_84_P762751 | AT3G10986 | 2.02  | 2.10   | 5.23   | Arabidopsis      |
| A_84_P10829  | AT3G13730 | -6.01 | 2.47   | 1.15   | cytochrome       |
| A_84_P842922 | AT3G13980 | -3.46 | -2.46  | -7.29  | Arabidopsis      |
| A_84_P15501  | AT3G15370 | 4.19  | -8.23  | -1.26  | expansin,        |
| A_84_P805073 | AT3G15450 | 2.34  | -38.08 | -47.79 | similar to       |
| A_84_P11727  | AT3G15670 | 2.67  | 10.47  | 26.81  | late             |
| A_84_P841540 | AT3G20830 | -2.36 | -2.90  | -4.69  | Arabidopsis      |
| A_84_P591926 | AT3G21680 | 3.16  | 6.13   | 13.44  | expressed        |
| A_84_P23101  | AT3G21890 | 2.70  | 4.67   | 2.50   | zinc finger (B-  |
| A_84_P23070  | AT3G22740 | -2.13 | -23.15 | -18.79 | homocysteine S-  |



|              |           |        |        |        |                   |
|--------------|-----------|--------|--------|--------|-------------------|
| A_84_P15503, | AT3G22830 | 2.35   | 24.77  | 2.76   | AT-HSFA6B         |
| A_84_P860303 | AT3G23170 | -2.56  | 3.70   | 2.18   | Arabidopsis       |
| A_84_P247395 | AT3G26470 | 2.05   | 4.10   | 4.50   | expressed         |
| A_84_P12704, | AT3G27200 | -2.16  | 2.50   | 3.00   | Arabidopsis       |
| A_84_P759661 | AT3G27500 | 2.24   | -4.89  | 1.45   | Arabidopsis       |
| A_84_P22181  | AT3G28210 | 2.21   | 23.22  | 25.81  | zinc finger (AN1- |
| A_84_P100746 | AT3G28220 | -2.37  | -5.70  | -5.18  | meprin and        |
| A_84_P12725  | AT3G28510 | 2.04   | 19.37  | 21.18  | AAA-type          |
| A_84_P826388 | AT3G30180 | -4.26  | -2.54  | -1.95  | BR6OX2/CYP85      |
| A_84_P18416  | AT3G46080 | 3.36   | 12.33  | 18.44  | zinc finger       |
| A_84_P19362  | AT3G46090 | 3.94   | 2.55   | 7.08   | zinc finger       |
| A_84_P12747  | AT3G46700 | -2.37  | -12.45 | -16.41 | UDP-              |
| A_84_P192624 | AT3G49840 | 2.49   | 2.33   | 4.26   | proline-rich      |
| A_84_P13706  | AT3G50140 | 2.16   | -3.67  | -1.66  | expressed         |
| A_84_P24110  | AT3G50270 | 2.12   | -2.49  | -2.52  | transferase       |
| A_84_P12763  | AT3G50560 | 2.21   | -19.43 | -5.61  | short-chain       |
| A_84_P157735 | AT3G51400 | -11.97 | -5.48  | -18.10 | expressed         |
| A_84_P813219 | AT3G54810 | 2.04   | 2.64   | 4.90   | BME3/BME3-ZF      |
| A_84_P821534 | AT3G55010 | 3.02   | 5.94   | 9.34   | ATPURM/PUR5;      |
| A_84_P14678  | AT3G56000 | 2.17   | -10.06 | -4.44  | glycosyl          |
| A_84_P849984 | AT3G56080 | 2.08   | 9.90   | 10.44  | Arabidopsis       |
| A_84_P16571  | AT3G56400 | 2.48   | -3.09  | -1.95  | WRKY family       |
| A_84_P861025 | AT3G56910 | -2.14  | -2.93  | -6.59  | PSRP5 (PLASTID-   |
| A_84_P14682  | AT3G57010 | -3.87  | 38.95  | 22.51  | strictosidine     |
| A_84_P20359  | AT3G57540 | -2.11  | 4.48   | 3.88   | remorin family    |
| A_84_P18473  | AT3G59140 | 2.36   | 11.40  | 11.98  | ABC               |
| A_84_P556409 | AT3G60650 | 3.84   | -3.04  | -1.26  | expressed         |
| A_84_P173361 | AT3G62570 | 2.29   | -3.84  | -1.97  | DNAJ heat         |
| A_84_P20381  | AT3G63110 | -2.27  | 5.70   | 4.69   | adenylate         |
| A_84_P14717  | AT4G01630 | 10.87  | 32.65  | 99.38  | expansin,         |
| A_84_P16609, | AT4G01870 | -5.15  | 2.09   | -5.65  | Arabidopsis       |
| A_84_P10949  | AT4G05100 | -2.06  | 2.07   | -2.37  | myb family        |
| A_84_P22299  | AT4G07960 | 3.12   | -2.60  | 1.01   | glycosyl          |
| A_84_P10014  | AT4G10160 | 2.25   | -9.61  | -6.59  | zinc finger       |
| A_84_P855052 | AT4G14130 | -4.04  | -3.29  | -49.79 | XTR7              |
| A_84_P596516 | AT4G14450 | -2.46  | 3.57   | 2.27   | expressed         |
| A_84_P10124  | AT4G14560 | -2.67  | -3.41  | -16.52 | auxin-            |
| A_84_P12960  | AT4G14630 | 2.20   | -3.61  | -1.86  | germin-like       |
| A_84_P576905 | AT4G16515 | 2.12   | -3.09  | 1.56   | unknown           |
| A_84_P10131  | AT4G16690 | -2.26  | -22.66 | -17.10 | esterase/lipase   |
| A_84_P17597  | AT4G18880 | 2.62   | 7.74   | 11.60  | heat shock        |
| A_84_P11926  | AT4G19380 | -4.19  | -18.03 | -3.78  | alcohol oxidase-  |
| A_84_P765234 | AT4G21745 | 2.16   | -13.72 | -2.46  | Arabidopsis       |
| A_84_P812152 | AT4G21850 | 2.46   | -2.08  | -1.11  | methionine        |
| A_84_P534335 | AT4G21970 | 2.74   | -7.44  | -3.83  | expressed         |

|              |           |        |        |        |                  |
|--------------|-----------|--------|--------|--------|------------------|
| A_84_P17611  | AT4G22460 | -3.71  | -3.42  | -1.59  | protease         |
| A_84_P18557  | AT4G22470 | -2.70  | 2.14   | 1.09   | protease         |
| A_84_P14776  | AT4G23180 | 2.07   | 2.21   | 4.29   | receptor-like    |
| A_84_P528136 | AT4G23190 | 2.09   | 3.83   | 3.61   | CRK11            |
| A_84_P15734  | AT4G25810 | 2.80   | -3.57  | -1.32  | xyloglucan:xylo  |
| A_84_P20466  | AT4G26260 | 2.77   | -33.86 | -10.48 | expressed        |
| A_84_P785948 | AT4G26320 | 2.22   | -6.09  | -2.31  | AGP13            |
| A_84_P823127 | AT4G27050 | -2.08  | -2.20  | -11.95 | Arabidopsis      |
| A_84_P564464 | AT4G27460 | 2.10   | -4.13  | -1.80  | Arabidopsis      |
| A_84_P606349 | AT4G28460 | 2.74   | 6.26   | 4.69   | hypothetical     |
| A_84_P825877 | AT4G28650 | 2.91   | 3.03   | 9.11   | Arabidopsis      |
| A_84_P19534  | AT4G29340 | 2.22   | 4.04   | 3.89   | profilin 3       |
| A_84_P79989  | AT4G29520 | 3.43   | 7.41   | 15.46  | expressed        |
| A_84_P212828 | AT4G30280 | 2.39   | -3.32  | 1.02   | xyloglucan:xylo  |
| A_84_P10083  | AT4G30290 | 3.19   | 2.50   | 35.89  | xyloglucan:xylo  |
| A_84_P14814  | AT4G31470 | 4.39   | 4.82   | 29.48  | pathogenesis-    |
| A_84_P18604  | AT4G33020 | -2.16  | 2.34   | 1.99   | metal            |
| A_84_P22388  | AT4G33070 | -2.16  | 17.22  | 15.20  | pyruvate         |
| A_84_P10101, | AT4G34610 | -2.07  | 3.65   | 4.41   | BLH6 (BELL1-     |
| A_84_P12944, | AT4G36110 | 3.89   | -3.21  | 2.18   | Arabidopsis      |
| A_84_P159605 | AT4G37070 | -2.68  | -3.81  | -2.57  | PLA IVA/PLP1;    |
| A_84_P765161 | AT4G37608 | -2.09  | 2.24   | 3.35   | Arabidopsis      |
| A_84_P10114  | AT4G38400 | 2.58   | -10.13 | -3.35  | expansin family  |
| A_84_P810008 | AT4G39330 | 2.12   | 10.37  | 17.00  | mannitol         |
| A_84_P12011  | AT4G39800 | -4.38  | 7.27   | 4.67   | inositol-3-      |
| A_84_P23380  | AT5G01540 | 3.30   | 5.35   | 13.06  | lectin protein   |
| A_84_P10141  | AT5G01550 | 3.22   | 6.50   | 20.39  | lectin protein   |
| A_84_P22435  | AT5G01740 | -66.18 | -2.81  | -17.23 | expressed        |
| A_84_P506004 | AT5G01790 | 2.21   | 13.35  | 16.49  | expressed        |
| A_84_P70894  | AT5G01840 | -2.78  | 2.75   | 1.59   | ovate family     |
| A_84_P556555 | AT5G02490 | 3.10   | 5.86   | 9.32   | heat shock       |
| A_84_P103716 | AT5G03350 | 2.79   | -3.53  | 1.02   | legume lectin    |
| A_84_P19609  | AT5G05390 | 2.52   | 3.96   | 6.49   | laccase,         |
| A_84_P575222 | AT5G09800 | -2.82  | 7.17   | 7.52   | U-box domain-    |
| A_84_P18678  | AT5G09870 | 2.11   | 2.92   | 5.72   | cellulose        |
| A_84_P18683  | AT5G10970 | 2.53   | 7.76   | 9.74   | zinc finger      |
| A_84_P524680 | AT5G13220 | 2.07   | -2.59  | -1.16  | JAS1/JAZ10/TIF   |
| A_84_P14907  | AT5G13700 | -2.16  | 2.09   | -1.35  | polyamine        |
| A_84_P18691, | AT5G13740 | -2.20  | -4.96  | -50.86 | ZIF1 (ZINC       |
| A_84_P19794  | AT5G14750 | 2.93   | 3.09   | 9.02   | myb family       |
| A_84_P226699 | AT5G15050 | 2.16   | 5.72   | 11.93  | glycosyltransfer |
| A_84_P20748  | AT5G17520 | -2.03  | 3.27   | 2.99   | root cap 1       |
| A_84_P16807  | AT5G17760 | -2.01  | 4.79   | 1.80   | AAA-type         |
| A_84_P13031  | AT5G19110 | 4.51   | -2.77  | -1.80  | extracellular    |
| A_84_P92929, | AT5G19240 | 2.70   | 4.18   | 10.61  | Arabidopsis      |

|              |           |        |         |        |                  |
|--------------|-----------|--------|---------|--------|------------------|
| A_84_P223799 | AT5G22100 | -3.16  | 3.01    | 4.22   | RNA cyclase      |
| A_84_P174931 | AT5G22940 | 2.14   | -2.77   | -1.20  | exostosin        |
| A_84_P139871 | AT5G25190 | 2.87   | 3.07    | 19.10  | ethylene-        |
| A_84_P825802 | AT5G25250 | 2.93   | 2.20    | 3.20   | Arabidopsis      |
| A_84_P826308 | AT5G25820 | 3.18   | 7.69    | 8.44   | exostosin        |
| A_84_P258360 | AT5G26290 | -2.97  | 8.19    | 5.75   | meprin and       |
| A_84_P515865 | AT5G26690 | 2.47   | -6.63   | -1.38  | heavy-metal-     |
| A_84_P169711 | AT5G28840 | -2.10  | -4.30   | -14.55 | GDP-D-           |
| A_84_P187371 | AT5G38710 | 5.65   | -10.48  | -14.44 | proline oxidase, |
| A_84_P168481 | AT5G39580 | 2.05   | -2.19   | -1.39  | Arabidopsis      |
| A_84_P612712 | AT5G41300 | 2.12   | -9.08   | -3.77  | receptor-like    |
| A_84_P234781 | AT5G41750 | 5.86   | 7.00    | 9.52   | Arabidopsis      |
| A_84_P769417 | AT5G41761 | -2.19  | -10.28  | -3.07  | Arabidopsis      |
| A_84_P130771 | AT5G42380 | 3.98   | 10.22   | 15.09  | CML37/CML39;     |
| A_84_P149691 | AT5G43030 | 2.19   | -3.86   | -1.45  | DC1 domain-      |
| A_84_P511454 | AT5G43570 | -2.67  | -15.35  | -24.80 | serine protease  |
| A_84_P178151 | AT5G45200 | 3.38   | 2.48    | 6.84   | disease          |
| A_84_P206641 | AT5G48010 | -2.10  | 42.14   | 34.73  | pentacyclic      |
| A_84_P139909 | AT5G49100 | -2.48  | 2.01    | 1.98   | expressed        |
| A_84_P220678 | AT5G50590 | 2.09   | -13.22  | -5.48  | short-chain      |
| A_84_P159461 | AT5G51440 | 2.64   | 37.76   | 3.92   | 23.5 kDa         |
| A_84_P302000 | AT5G53250 | 2.01   | -14.19  | -15.03 | arabinogalacta   |
| A_84_P262520 | AT5G55620 | -2.31  | 10.48   | 24.24  | expressed        |
| A_84_P121811 | AT5G56000 | 2.44   | 11.34   | 12.58  | heat shock       |
| A_84_P131301 | AT5G57220 | 2.25   | 12.62   | 5.10   | cytochrome       |
| A_84_P178591 | AT5G57560 | 3.36   | -12.77  | -15.49 | xyloglucan:xylo  |
| A_84_P828057 | AT5G57780 | -5.80  | -3.43   | -3.84  | Arabidopsis      |
| A_84_P559359 | AT5G57785 | -10.18 | -5.77   | -53.15 | expressed        |
| A_84_P178721 | AT5G60520 | 2.20   | 6.83    | 17.10  | late             |
| A_84_P530135 | AT5G60880 | 2.21   | 4.02    | 9.49   | unknown          |
| A_84_P150431 | AT5G62340 | 2.62   | -2.29   | -1.00  | invertase/pecti  |
| A_84_P207241 | AT5G63790 | -2.31  | 4.19    | 1.48   | ANAC102          |
| A_84_P161403 | AT5G63820 | 2.88   | -7.16   | -1.22  | expressed        |
| A_84_P800757 | AT5G64260 | -2.76  | -2.57   | -7.66  | phosphate-       |
| A_84_P160863 | AT5G64980 | 2.16   | 8.40    | 9.25   | expressed        |
| A_84_P555846 | AT5G65030 | -2.77  | 8.50    | 5.12   | expressed        |
| A_84_P602901 | AT5G65300 | -6.54  | 2.62    | -1.17  | expressed        |
| A_84_P169481 | AT5G65730 | -2.02  | -110.66 | -36.27 | xyloglucan:xylo  |
| A_84_P103321 | AT5G66110 | -2.06  | -12.06  | -9.16  | HEAVY METAL      |
| A_84_P546117 | AT5G66985 | -2.06  | 7.44    | 3.50   | expressed        |

| All Gene Symbols | Gene Symbol |
|------------------|-------------|
| MAP KINASE 11    |             |
|                  |             |
| GSTF7; GST11     | GSTF7       |
| GSTF6            |             |
|                  |             |
|                  |             |
|                  |             |
| PEROXIDASE 4     |             |
|                  |             |
| NUDIX            |             |
|                  |             |
|                  |             |
|                  |             |
| ATICS2           |             |
|                  |             |
|                  |             |
|                  |             |
|                  |             |
|                  |             |
| PHOSPHATE-       | PHI-1       |
|                  |             |
|                  |             |
|                  |             |
| SCARECROW-       |             |
| PROTEIN          |             |
|                  |             |
|                  |             |
|                  |             |
| G-TMT            |             |
| YELLOW STRIPE    |             |
|                  |             |
| MICRORNA414      |             |
|                  |             |
|                  |             |
| TOLL/INTERLEU    |             |
| CKX5; ATCKX6     |             |
| SKU5 SIMILAR 5   | sks5        |
|                  |             |
|                  |             |

| color key   |               |           |
|-------------|---------------|-----------|
| upregulated | downregulated | unchanged |

|                |         |
|----------------|---------|
| DSPTP1E; IBR5  |         |
|                |         |
| MONOGALACT     |         |
|                |         |
| UDP-           | UGT73B4 |
| ATERF53;ERF    |         |
| WRKY DNA-      | WRKY59  |
| AGP2           |         |
| CYP96A1        |         |
| CLF            |         |
| METHYL         |         |
| GLR2.3         |         |
|                |         |
| ATHSFA2        |         |
| UDP-GLUCOSYL   |         |
| PHYB           |         |
| CYP71A12       |         |
| GH9B8          |         |
| CIPK13; ATWL2; |         |
| YELLOW-LEAF-   |         |
| ACR10          |         |
|                |         |
| ANN3           |         |
|                |         |
| TOUCH 3        | TCH3    |
| RECEPTOR LIKE  |         |
| CHITINASE,     |         |
|                |         |
| WRKY DNA-      | WRKY46  |
|                |         |
|                |         |
|                |         |
|                |         |
| LACCASE 7      |         |
|                |         |
| CYP90D1        |         |
|                |         |
| ATEXPA12;      |         |
|                |         |
|                |         |
|                |         |
|                |         |
| HOMOCYSTEIN    |         |

|               |       |
|---------------|-------|
| HSFA6B        |       |
|               |       |
|               |       |
|               |       |
| STRESS-       |       |
|               |       |
|               |       |
| BR6OX2        |       |
|               |       |
| ZAT7          |       |
|               |       |
|               |       |
|               |       |
|               |       |
| BME3-         | BME3  |
| EMBRYO        |       |
| CSLA14        |       |
|               |       |
| WRKY DNA-     |       |
| PLASTID-      | PSRP5 |
|               |       |
|               |       |
| MULTIDRUG     |       |
|               |       |
|               |       |
| ISOPENTENYL   |       |
| ATEXP17;      |       |
|               |       |
| MYB DOMAIN    |       |
| CSLC12        |       |
|               |       |
| XYLOGLUCAN    | XTH15 |
|               |       |
| IAA1; AXR5    |       |
| GLP9          |       |
| GLV1; CLEL 6; | RGF6  |
| ARABIDOPSIS   |       |
| ARABIDOPSIS   |       |
|               |       |
|               |       |
| METHIONINE    | MSRB9 |
|               |       |

|                             |       |
|-----------------------------|-------|
|                             |       |
|                             |       |
| RLK4;CYSTEINE-RECEPTOR LIKE | CRK11 |
|                             |       |
| CIL                         |       |
| MYO-INOSITOL                | AGP13 |
|                             |       |
|                             |       |
|                             |       |
|                             |       |
| PROFILIN 4                  |       |
|                             |       |
| XYLOGLUCAN                  |       |
| FLA5                        |       |
|                             |       |
| ATZIP9; ZIP9                |       |
| BLH6                        |       |
|                             |       |
| PLP1; BEH2                  |       |
|                             |       |
| 1-AMINO-                    |       |
| CAD9                        |       |
| MYO-INOSITOL-               |       |
| LECTIN                      |       |
| LECTIN                      |       |
|                             |       |
|                             |       |
| OVATE FAMILY                |       |
| AtHsp70-2;                  |       |
|                             |       |
| LACCASE 12                  |       |
|                             |       |
| CESA5                       |       |
|                             |       |
| JASMONATE-                  | JAZ10 |
| POLYAMINE                   |       |
| ZINC INDUCED                | ZIF1  |
| WEREWOLF                    |       |
|                             |       |
| MALTOSE                     |       |
|                             |       |
|                             |       |
|                             |       |

|             |         |
|-------------|---------|
|             |         |
| F8H         |         |
| ESE3        |         |
| FLOT1       |         |
|             |         |
|             |         |
|             |         |
| GME         | GME     |
|             |         |
|             |         |
|             |         |
|             |         |
| CML37       |         |
|             |         |
|             |         |
|             |         |
| THALIANOL   |         |
|             |         |
| HYDROXYSTER |         |
|             |         |
| AGP22       |         |
|             |         |
| Hsp81.4     | Hsp81.4 |
| CYP81F2     |         |
| XYLOGLUCAN  |         |
| P1R1 P1R1   |         |
|             |         |
|             |         |
| BASL        | BASL    |
|             |         |
| NAC DOMAIN  | NAC102  |
|             |         |
| EXL2        | EXL2    |
|             |         |
|             |         |
|             |         |
| XYLOGLUCAN  |         |
| HIPP27      |         |
|             |         |



**Genes in which BR regulation is affected (2 fold more/less or lost) significantly in prese**

| Probe set_ID   | Representative Public ID | 0% Glc + 100 nM BR vs 0% Glc | 3% Glc vs 0% Glc | 3% Glc + 100 nM BR vs 0% Glc |
|----------------|--------------------------|------------------------------|------------------|------------------------------|
| A_84_P14717 8  | AT4G01630                | 10.87                        | 32.65            | 99.38                        |
| A_84_P19231 8  | AT2G26150                | 3.66                         | 75.17            | 91.66                        |
| A_84_P18691,A  | AT5G13740                | -2.20                        | -4.96            | -50.86                       |
| A_84_P855052,A | AT4G14130                | -4.04                        | -3.29            | -49.79                       |
| A_84_P559359   | AT5G57785                | -10.18                       | -5.77            | -53.15                       |
| A_84_P14313,A  | AT1G19970                | 2.08                         | 45.37            | 40.93                        |
| A_84_P19294,A  | AT1G26380                | 3.10                         | 41.95            | 40.12                        |
| A_84_P16948 8  | AT5G65730                | -2.02                        | -110.66          | -36.27                       |
| A_84_P10083 8  | AT4G30290                | 3.19                         | 2.50             | 35.89                        |
| A_84_P20416 8  | AT4G10350                | 2.33                         | 1.53             | 32.51                        |
| A_84_P14814 8  | AT4G31470                | 4.39                         | 4.82             | 29.48                        |
| A_84_P11727 8  | AT3G15670                | 2.67                         | 10.47            | 26.81                        |
| A_84_P22181 8  | AT3G28210                | 2.21                         | 23.22            | 25.81                        |
| A_84_P157715   | AT1G72930                | 2.74                         | 20.54            | 26.13                        |
| A_84_P15423 8  | AT2G23620                | -2.05                        | -9.34            | -24.54                       |
| A_84_P511454   | AT5G43570                | -2.67                        | -15.35           | -24.80                       |
| A_84_P280900,A | AT3G07350                | -2.10                        | -32.87           | -22.74                       |
| A_84_P765351   | AT4G40011                | 2.05                         | 1.66             | 22.08                        |
| A_84_P12725 8  | AT3G28510                | 2.04                         | 19.37            | 21.18                        |
| A_84_P19256 8  | AT3G09220                | -2.29                        | -9.86            | -20.91                       |
| A_84_P16055    | 1G35612///TC2596         | -2.04                        | -5.04            | -20.42                       |
| A_84_P842079   | AT1G67195                | 2.55                         | 10.13            | 20.48                        |
| A_84_P10141 8  | AT5G01550                | 3.22                         | 6.50             | 20.39                        |
| A_84_P23070 8  | AT3G22740                | -2.13                        | -23.15           | -18.79                       |
| A_84_P13987 8  | AT5G25190                | 2.87                         | 3.07             | 19.10                        |
| A_84_P162603   | AT4G36780                | -2.38                        | -1.30            | -18.27                       |
| A_84_P17191 8  | AT1G07160                | 2.66                         | 10.68            | 17.93                        |
| A_84_P18416 8  | AT3G46080                | 3.36                         | 12.33            | 18.44                        |
| A_84_P17872 8  | AT5G60520                | 2.20                         | 6.83             | 17.10                        |
| A_84_P810008   | AT4G39330                | 2.12                         | 10.37            | 17.00                        |
| A_84_P10131 8  | AT4G16690                | -2.26                        | -22.66           | -17.10                       |
| A_84_P16006 8  | AT5G66590                | -2.57                        | -1.05            | -17.07                       |
| A_84_P506004   | AT5G01790                | 2.21                         | 13.35            | 16.49                        |
| A_84_P12747 8  | AT3G46700                | -2.37                        | -12.45           | -16.41                       |
| A_84_P16097 8  | AT1G24140                | 10.84                        | 13.42            | 24.87                        |
| A_84_P10124 8  | AT4G14560                | -2.67                        | -3.41            | -16.52                       |
| A_84_P757973   | AT2G44578                | 2.59                         | 12.05            | 15.42                        |
| A_84_P14494 8  | AT2G39430                | -2.23                        | -2.19            | -14.69                       |
| A_84_P16971,A  | AT5G28840                | -2.10                        | -4.30            | -14.55                       |
| A_84_P10747 8  | AT1G53700                | 2.39                         | 3.58             | 14.54                        |

|                |           |        |        |        |
|----------------|-----------|--------|--------|--------|
| A_84_P79989 8  | AT4G29520 | 3.43   | 7.41   | 15.46  |
| A_84_P560506   | AT1G69430 | 2.55   | 4.44   | 14.03  |
| A_84_P13077,A  | AT5G42380 | 3.98   | 10.22  | 15.09  |
| A_84_P591926   | AT3G21680 | 3.16   | 6.13   | 13.44  |
| A_84_P12181,A  | AT5G56000 | 2.44   | 11.34  | 12.58  |
| A_84_P799181,A | AT1G05660 | 2.69   | 3.75   | 12.70  |
| A_84_P823127,A | AT4G27050 | -2.08  | -2.20  | -11.95 |
| A_84_P12547 8  | AT2G30750 | 2.19   | 32.94  | 11.97  |
| A_84_P226699   | AT5G15050 | 2.16   | 5.72   | 11.93  |
| A_84_P23380 8  | AT5G01540 | 3.30   | 5.35   | 13.06  |
| A_84_P18473 8  | AT3G59140 | 2.36   | 11.40  | 11.98  |
| A_84_P17597 8  | AT4G18880 | 2.62   | 7.74   | 11.60  |
| A_84_P138279   | AT1G58420 | 2.75   | 3.13   | 11.45  |
| A_84_P23919 8  | AT2G35980 | 2.40   | 17.21  | 10.99  |
| A_84_P849984,A | AT3G56080 | 2.08   | 9.90   | 10.44  |
| A_84_P92929,A  | AT5G19240 | 2.70   | 4.18   | 10.61  |
| A_84_P20237 8  | AT1G26420 | 2.74   | 10.06  | 10.35  |
| A_84_P268780,A | AT1G45010 | 2.47   | 11.44  | 9.87   |
| A_84_P11613 8  | AT2G34930 | 3.37   | 1.85   | 10.71  |
| A_84_P530135,A | AT5G60880 | 2.21   | 4.02   | 9.49   |
| A_84_P18683 8  | AT5G10970 | 2.53   | 7.76   | 9.74   |
| A_84_P10332 8  | AT5G66110 | -2.06  | -12.06 | -9.16  |
| A_84_P160863   | AT5G64980 | 2.16   | 8.40   | 9.25   |
| A_84_P13393 8  | AT1G66090 | 3.16   | 9.50   | 10.06  |
| A_84_P12005 8  | AT4G38410 | 2.77   | 1.69   | 9.57   |
| A_84_P516067   | AT1G17345 | -2.31  | -15.23 | -8.79  |
| A_84_P12389 8  | AT1G14860 | -3.64  | -3.65  | -10.03 |
| A_84_P821534   | AT3G55010 | 3.02   | 5.94   | 9.34   |
| A_84_P11694,A  | AT3G01830 | 3.38   | 6.39   | 9.64   |
| A_84_P556555   | AT5G02490 | 3.10   | 5.86   | 9.32   |
| A_84_P825877,A | AT4G28650 | 2.91   | 3.03   | 9.11   |
| A_84_P157735   | AT3G51400 | -11.97 | -5.48  | -18.10 |
| A_84_P19794 8  | AT5G14750 | 2.93   | 3.09   | 9.02   |
| A_84_P11417 8  | AT1G65730 | -2.05  | -3.33  | -7.36  |
| A_84_P826308   | AT5G25820 | 3.18   | 7.69   | 8.44   |
| A_84_P16369 8  | AT2G23380 | 3.14   | 4.26   | 8.05   |
| A_84_P800757,A | AT5G64260 | -2.76  | -2.57  | -7.66  |
| A_84_P861025,A | AT3G56910 | -2.14  | -2.93  | -6.59  |
| A_84_P297064   | AT1G65310 | 4.03   | -1.17  | 8.39   |
| A_84_P22847 8  | AT1G14550 | 2.24   | 12.93  | 6.45   |
| A_84_P61660 8  | AT2G15220 | 2.85   | 6.20   | 6.94   |
| A_84_P19609 8  | AT5G05390 | 2.52   | 3.96   | 6.49   |
| A_84_P186814   | AT2G46495 | 2.17   | 8.66   | 6.12   |
| A_84_P14255 8  | AT1G64970 | 2.59   | 7.08   | 6.47   |
| A_84_P842922,A | AT3G13980 | -3.46  | -2.46  | -7.29  |

|                |                  |       |        |       |
|----------------|------------------|-------|--------|-------|
| A_84_P23478,A  | AT5G41750        | 5.86  | 7.00   | 9.52  |
| A_84_P18678 8  | AT5G09870        | 2.11  | 2.92   | 5.72  |
| A_84_P22001 8  | AT2G24710        | -2.15 | -13.67 | -5.67 |
| A_84_P17815 8  | AT5G45200        | 3.38  | 2.48   | 6.84  |
| A_84_P801239,A | AT1G02920        | 2.53  | 4.53   | 5.73  |
| A_84_P762751   | AT3G10986        | 2.02  | 2.10   | 5.23  |
| A_84_P19362 8  | AT3G46090        | 3.94  | 2.55   | 7.08  |
| A_84_P23570 8  | AT5G65800        | 4.67  | 1.29   | 7.77  |
| A_84_P16226 8  | AT1G14540        | 2.14  | 3.86   | 5.06  |
| A_84_P813219,A | AT3G54810        | 2.04  | 2.64   | 4.90  |
| A_84_P13130 8  | AT5G57220        | 2.25  | 12.62  | 5.10  |
| A_84_P100746   | AT3G28220        | -2.37 | -5.70  | -5.18 |
| A_84_P848499   | AT5G35935        | -2.32 | 1.21   | -5.06 |
| A_84_P522242   | AT1G07985        | -3.13 | -1.62  | -5.80 |
| A_84_P20622 8  | AT5G36260        | 3.31  | 1.65   | 5.91  |
| A_84_P247395   | AT3G26470        | 2.05  | 4.10   | 4.50  |
| A_84_P853187,A | AT4G34150        | 2.03  | 1.93   | 4.42  |
| A_84_P841540,A | AT3G20830        | -2.36 | -2.90  | -4.69 |
| A_84_P21007 8  | AT2G43570        | 2.99  | 7.91   | 5.29  |
| A_84_P207798   | AT2G31540        | 2.42  | 1.03   | 4.67  |
| A_84_P20150 8  | AT2G04550        | -7.04 | -18.33 | -9.28 |
| A_84_P22546,A  | AT5G45670        | 2.86  | 1.42   | 5.09  |
| A_84_P14776 8  | AT4G23180        | 2.07  | 2.21   | 4.29  |
| A_84_P13252 8  | AT1G24470        | 2.85  | 1.57   | 5.07  |
| A_84_P812454,A | AT1G02930        | 2.80  | 4.12   | 4.90  |
| A_84_P576905,A | AT4G16515        | 2.12  | 6.60   | 1.92  |
| A_84_P22481 8  | AT5G16590        | 2.27  | 3.63   | 1.80  |
| A_84_P10949 8  | AT4G05100        | -2.06 | 2.07   | -1.53 |
| A_84_P537376   | AT1G29420        | 2.13  | 2.05   | 1.58  |
| A_84_P522715   | AT3G54830        | 2.48  | 1.99   | 1.90  |
| A_84_P296724,A | AT5G51190        | 2.21  | 1.99   | 1.56  |
| A_84_P759661   | AT3G27500        | 2.24  | 1.82   | 1.59  |
| A_84_P268090,A | AT2G01300        | 2.33  | 1.80   | 1.45  |
| A_84_P22262 8  | AT3G60390        | -2.30 | -1.19  | -1.33 |
| A_84_P159605,A | AT4G37070        | -2.68 | -3.81  | -1.71 |
| A_84_P769417   | AT5G41761        | -2.19 | -10.28 | -1.18 |
| A_84_P212828   | AT4G30280        | 2.39  | 1.50   | 1.30  |
| A_84_P10788 8  | AT3G25900        | 2.48  | 1.33   | 1.37  |
| A_84_P11953 8  | AT4G25780        | -3.14 | -1.88  | -1.87 |
| A_84_P14468 8  | AT1G75450        | -2.79 | -3.05  | -1.49 |
| A_84_P558814   | AT2G25780        | -2.78 | -10.71 | -1.04 |
| A_84_P103716   | AT5G03350        | 2.79  | 1.28   | 1.02  |
| A_84_P14703 5  | 1G05835///TC2666 | -2.99 | -1.55  | -1.11 |
| A_84_P18950,A  | AT1G04660        | 3.51  | 1.14   | 1.47  |
| A_84_P22299 8  | AT4G07960        | 3.12  | 1.01   | 1.01  |

|                |           |       |        |       |
|----------------|-----------|-------|--------|-------|
| A_84_P17611 8  | AT4G22460 | -3.71 | -3.42  | -1.59 |
| A_84_P546443   | AT2G28085 | 3.22  | -1.06  | 1.01  |
| A_84_P826388,/ | AT3G30180 | -4.26 | -2.54  | -1.95 |
| A_84_P251265,/ | AT1G63720 | -4.14 | 1.26   | -1.79 |
| A_84_P81479 8  | AT3G19380 | -3.83 | 1.20   | -1.29 |
| A_84_P579358   | AT3G01516 | -9.47 | -6.32  | -6.85 |
| A_84_P13475 8  | AT2G11810 | 3.74  | -1.16  | 1.02  |
| A_84_P12944,A  | AT4G36110 | 3.89  | -1.18  | 1.15  |
| A_84_P586802   | AT5G01015 | 5.09  | -1.19  | 2.27  |
| A_84_P260340   | AT1G76240 | -4.42 | -10.27 | -1.54 |
| A_84_P524680,/ | AT5G13220 | 2.07  | -1.28  | -1.16 |
| A_84_P17343 8  | AT2G44840 | 7.30  | -1.50  | 3.98  |
| A_84_P13719 8  | AT3G53150 | 2.13  | -1.52  | -1.20 |
| A_84_P174931   | AT5G22940 | 2.14  | -1.54  | -1.20 |
| A_84_P14310 8  | AT1G14720 | -2.07 | 1.11   | 1.30  |
| A_84_P16848,A  | AT5G39580 | 2.05  | -1.60  | -1.39 |
| A_84_P826352,/ | AT1G16750 | -2.14 | 3.14   | 1.32  |
| A_84_P812152,/ | AT4G21850 | 2.46  | -1.61  | -1.11 |
| A_84_P12484 8  | AT1G58170 | -2.22 | 10.87  | 1.37  |
| A_84_P15043 8  | AT5G62340 | 2.62  | -1.75  | -1.00 |
| A_84_P14969 8  | AT5G43030 | 2.19  | -1.91  | -1.45 |
| A_84_P21249 8  | AT1G02650 | 2.19  | -1.95  | -1.46 |
| A_84_P18845 8  | AT1G48000 | -2.37 | 1.88   | 1.37  |
| A_84_P18557 8  | AT4G22470 | -2.70 | 2.14   | 1.09  |
| A_84_P20724,A  | AT5G63790 | -2.31 | 4.19   | 1.48  |
| A_84_P16609,A  | AT4G01870 | -5.15 | 2.09   | -1.35 |
| A_84_P16807 8  | AT5G17760 | -2.01 | 4.79   | 1.80  |
| A_84_P13706 8  | AT3G50140 | 2.16  | -2.08  | -1.66 |
| A_84_P515865   | AT5G26690 | 2.47  | -2.19  | -1.38 |
| A_84_P221516,/ | AT2G21900 | 2.17  | -2.29  | -1.71 |
| A_84_P184384   | AT1G68440 | 2.00  | -38.08 | -1.88 |
| A_84_P564464,/ | AT4G27460 | 2.10  | -2.32  | -1.80 |
| A_84_P21517 8  | AT1G31310 | -2.11 | -1.38  | 1.80  |
| A_84_P805374,/ | AT1G76160 | 2.62  | -2.49  | -1.33 |
| A_84_P816739,/ | AT1G44970 | -2.67 | -1.28  | 1.29  |
| A_84_P12960 8  | AT4G14630 | 2.20  | -2.54  | -1.86 |
| A_84_P16277,A  | AT2G43610 | 2.40  | -2.59  | -1.68 |
| A_84_P161403   | AT5G63820 | 2.88  | -2.60  | -1.22 |
| A_84_P16321 8  | AT2G20420 | -2.17 | 1.49   | 1.95  |
| A_84_P15734 8  | AT4G25810 | 2.80  | -2.77  | -1.32 |
| A_84_P18604 8  | AT4G33020 | -2.16 | 2.34   | 1.99  |
| A_84_P541789,/ | AT1G26250 | 2.21  | -2.77  | -1.95 |
| A_84_P173361   | AT3G62570 | 2.29  | -3.04  | -1.97 |
| A_84_P70894 8  | AT5G01840 | -2.78 | 2.75   | 1.59  |
| A_84_P763492,/ | AT4G12510 | -2.43 | -1.24  | 1.96  |

|                |           |       |       |       |
|----------------|-----------|-------|-------|-------|
| A_84_P16571 8  | AT3G56400 | 2.48  | -3.09 | -1.95 |
| A_84_P829727,A | AT5G13320 | 6.22  | -3.09 | 1.79  |
| A_84_P139909   | AT5G49100 | -2.48 | 2.01  | 1.98  |
| A_84_P11184 8  | AT1G72240 | 2.45  | -3.21 | -2.01 |
| A_84_P21622 8  | AT5G51480 | 6.00  | -3.32 | 1.50  |
| A_84_P785948,A | AT4G26320 | 2.22  | -3.37 | -2.31 |
| A_84_P765234   | AT4G21745 | 2.16  | -3.39 | -2.46 |
| A_84_P604788   | AT5G59510 | -2.25 | 1.91  | 2.37  |
| A_84_P24110 8  | AT3G50270 | 2.12  | -3.53 | -2.52 |
| A_84_P14479 8  | AT2G40250 | 7.20  | -3.57 | 2.52  |
| A_84_P14749 8  | AT4G12430 | 2.45  | -3.61 | -2.23 |
| A_84_P596516   | AT4G14450 | -2.46 | 3.57  | 2.27  |
| A_84_P860303,A | AT3G23170 | -2.56 | 3.70  | 2.18  |
| A_84_P21869 8  | AT1G77690 | -3.17 | 1.63  | 1.63  |
| A_84_P21159 8  | AT3G04010 | -3.75 | 1.90  | 1.07  |
| A_84_P824506,A | AT1G51680 | -2.05 | 1.88  | 2.80  |
| A_84_P20748 8  | AT5G17520 | -2.03 | 3.27  | 2.99  |
| A_84_P813874,A | AT4G12720 | 2.87  | -3.67 | -2.17 |
| A_84_P556409   | AT3G60650 | 3.84  | -3.84 | -1.26 |
| A_84_P799584,A | AT1G62975 | -2.44 | 2.01  | 2.68  |
| A_84_P12704,A  | AT3G27200 | -2.16 | 2.50  | 3.00  |
| A_84_P16316 8  | AT2G23180 | -2.21 | 2.47  | 2.98  |
| A_84_P601261   | AT2G07140 | 2.15  | -3.86 | -3.08 |
| A_84_P23571 8  | AT5G66080 | -7.36 | 1.30  | -2.06 |
| A_84_P60290 8  | AT5G65300 | -6.54 | 2.62  | -1.17 |
| A_84_P765161   | AT4G37608 | -2.09 | 2.24  | 3.35  |
| A_84_P15501 8  | AT3G15370 | 4.19  | -3.87 | -1.26 |
| A_84_P546117   | AT5G66985 | -2.06 | 7.44  | 3.50  |
| A_84_P10647 8  | AT2G26480 | 6.77  | -4.04 | 1.03  |
| A_84_P258420   | AT2G04500 | 3.63  | -4.13 | -2.12 |
| A_84_P53570 8  | AT2G41810 | -2.10 | 1.30  | 3.77  |
| A_84_P14435 8  | AT2G26710 | 2.22  | -4.13 | -3.67 |
| A_84_P612712   | AT5G41300 | 2.12  | -4.89 | -3.77 |
| A_84_P10114 8  | AT4G38400 | 2.58  | -4.95 | -3.35 |
| A_84_P12872 8  | AT1G29270 | 2.17  | -5.10 | -3.80 |
| A_84_P20359 8  | AT3G57540 | -2.11 | 4.48  | 3.88  |
| A_84_P20594 8  | AT5G18560 | -9.13 | 1.07  | -3.07 |
| A_84_P13031 8  | AT5G19110 | 4.51  | -6.09 | -1.80 |
| A_84_P15343 8  | AT2G14960 | 8.03  | -6.63 | 1.70  |
| A_84_P19357 8  | AT3G44990 | 2.10  | -7.00 | -4.27 |
| A_84_P10101,A  | AT4G34610 | -2.07 | 3.65  | 4.41  |
| A_84_P534335   | AT4G21970 | 2.74  | -7.16 | -3.83 |
| A_84_P14678 8  | AT3G56000 | 2.17  | -7.42 | -4.44 |
| A_84_P537048,A | AT4G36105 | 8.73  | -7.44 | 1.94  |
| A_84_P20381 8  | AT3G63110 | -2.27 | 5.70  | 4.69  |

|               |           |        |        |        |
|---------------|-----------|--------|--------|--------|
| A_84_P13482 8 | AT2G38760 | 2.08   | -7.91  | -4.93  |
| A_84_P23422 8 | AT1G18280 | 2.04   | -8.23  | -5.01  |
| A_84_P10627 8 | AT2G20880 | 5.02   | -9.08  | -2.10  |
| A_84_P10829 8 | AT3G13730 | -6.01  | 2.47   | 1.15   |
| A_84_P14433 8 | AT2G32990 | -2.59  | 7.39   | 4.70   |
| A_84_P223799  | AT5G22100 | -3.16  | 3.01   | 4.22   |
| A_84_P220678  | AT5G50590 | 2.09   | -9.61  | -5.48  |
| A_84_P12763 8 | AT3G50560 | 2.21   | -9.80  | -5.61  |
| A_84_P555846  | AT5G65030 | -2.77  | 8.50   | 5.12   |
| A_84_P178324  | AT3G18710 | -7.04  | 1.69   | 1.42   |
| A_84_P233559  | AT1G10340 | 2.17   | -9.86  | -6.34  |
| A_84_P258360  | AT5G26290 | -2.97  | 8.19   | 5.75   |
| A_84_P10014 8 | AT4G10160 | 2.25   | -10.06 | -6.59  |
| A_84_P12011 8 | AT4G39800 | -4.38  | 7.27   | 4.67   |
| A_84_P20998,A | AT1G35140 | 2.92   | -10.13 | -6.43  |
| A_84_P22053,A | AT2G41100 | 2.68   | -10.48 | -6.85  |
| A_84_P15464 8 | AT3G03670 | 2.32   | -12.08 | -7.54  |
| A_84_P20630 8 | AT5G38970 | -14.60 | -1.44  | -4.69  |
| A_84_P13527 8 | AT2G37030 | -4.60  | -5.16  | 5.32   |
| A_84_P575222  | AT5G09800 | -2.82  | 7.17   | 7.52   |
| A_84_P14490 8 | AT2G34180 | 8.77   | -12.77 | -2.00  |
| A_84_P248025  | AT2G42800 | -3.15  | 5.44   | 7.69   |
| A_84_P243945  | AT5G22580 | -14.18 | 1.38   | -1.89  |
| A_84_P807670  | AT3G53990 | 2.07   | -13.22 | -10.47 |
| A_84_P22914,A | AT2G15490 | -2.09  | 23.93  | 10.61  |
| A_84_P17749 8 | AT5G15120 | 2.15   | -13.72 | -10.63 |
| A_84_P20466 8 | AT4G26260 | 2.77   | -14.19 | -10.48 |
| A_84_P302000  | AT5G53250 | 2.01   | -33.86 | -15.03 |
| A_84_P22388 8 | AT4G33070 | -2.16  | 17.22  | 15.20  |
| A_84_P17859 8 | AT5G57560 | 3.36   | -19.43 | -15.49 |
| A_84_P18737 8 | AT5G38710 | 5.65   | -20.48 | -14.44 |
| A_84_P14682 8 | AT3G57010 | -3.87  | 38.95  | 22.51  |
| A_84_P262520  | AT5G55620 | -2.31  | 10.48  | 24.24  |
| A_84_P20664 8 | AT5G48010 | -2.10  | 42.14  | 34.73  |
| A_84_P22435 8 | AT5G01740 | -66.18 | -2.81  | -17.23 |
| A_84_P805073  | AT3G15450 | 2.34   | -27.10 | -47.79 |

ence of Glc (256 genes)

| Gene Description                           | Gene Symbol | Change in extent of regulation |
|--------------------------------------------|-------------|--------------------------------|
| expansin, putative (EXP17) similar to      | AEXP17;     | 88.51                          |
| HEAT SHOCK TRANSCRIPTION FACTOR            | ATHSFA2     | 88.00                          |
| ZIF1 (ZINC INDUCED FACILITATOR 1);         | ZIF1        | 48.66                          |
| XTR7 (XYLOGLUCAN                           | XTH15       | 45.75                          |
| expressed protein [At5g57785.1]            |             | 42.96                          |
| Arabidopsis thaliana ER lumen protein      |             | 38.85                          |
| Arabidopsis thaliana FAD-binding and       |             | 37.02                          |
| xyloglucan:xyloglucosyl transferase,       | XTH6        | 34.24                          |
| xyloglucan:xyloglucosyl transferase,       | XTH18       | 32.70                          |
| no apical meristem (NAM) family protein    | ANAC070     | 30.18                          |
| pathogenesis-related protein, putative;    | FLA5        | 25.09                          |
| late embryogenesis abundant protein,       |             | 24.14                          |
| zinc finger (AN1-like) family protein      | SAP12; PMZ  | 23.61                          |
| Toll-Interleukin-Resistance (TIR) domain-  | TIR         | 23.39                          |
| esterase, putative similar to ethylene-    | MES1        | 22.49                          |
| serine protease inhibitor, potato          |             | 22.13                          |
| Arabidopsis thaliana uncharacterized       |             | 20.64                          |
| Arabidopsis thaliana uncharacterized       |             | 20.04                          |
| AAA-type ATPase family protein contains    |             | 19.14                          |
| laccase family protein / diphenol oxidase  | LAC7        | 18.62                          |
| Q9LQF9 (Q9LQF9) F15O4.26, complete         |             | 18.37                          |
| MIR414                                     | MIR414      | 17.92                          |
| lectin protein kinase, putative similar to | LECRKA4.2   | 17.17                          |
| homocysteine S-methyltransferase 3         | HMT3        | 16.66                          |
| ethylene-responsive element-binding        | ESE3        | 16.24                          |
| brassinosteroid signalling positive        | AtPMT6      | 15.89                          |
| protein phosphatase 2C, putative / PP2C,   |             | 15.27                          |
| zinc finger (C2H2 type) family protein     |             | 15.08                          |
| late embryogenesis abundant protein-       |             | 14.90                          |
| mannitol dehydrogenase, putative;          | CAD9        | 14.88                          |
| esterase/lipase/thioesterase family        | MES16       | 14.85                          |
| allergen V5/Tpx-1-related family protein   |             | 14.50                          |
| expressed protein [At5g01790.1]            |             | 14.28                          |
| UDP-glucuronosyl/UDP-glucosyl              |             | 14.04                          |
| matrixin family protein similar to matrix  |             | 14.03                          |
| auxin-responsive protein / indoleacetic    | IAA1; AXR5  | 13.85                          |
| Arabidopsis thaliana RING/U-box domain     |             | 12.83                          |
| disease resistance-responsive protein-     |             | 12.46                          |
| GDP-D-MANNOSE 3',5'-EPIMERASE; GDP-        | GME         | 12.45                          |
| protein kinase, putative similar to        | WAG1        | 12.14                          |

|             |
|-------------|
| upregulated |
| BR-up/d     |
| BR-up/d     |
| BR-up       |



|                                            |            |              |
|--------------------------------------------|------------|--------------|
| expressed protein [At4g29520.1]            | PROFILIN 4 | <b>12.02</b> |
| hypothetical protein [At1g69430.1]         |            | <b>11.48</b> |
| CML37/CML39; calcium ion binding           | CML37      | <b>11.11</b> |
| expressed protein [At3g21680.1]            |            | <b>10.29</b> |
| heat shock protein 81-4 (HSP81-4)          | Hsp81.4    | <b>10.13</b> |
| Arabidopsis thaliana Pectin lyase-like     |            | <b>10.00</b> |
| Arabidopsis thaliana F-box protein         |            | <b>9.86</b>  |
| cytochrome P450 71A12, putative            | CYP71A12   | <b>9.78</b>  |
| glycosyltransferase family 14 protein /    |            | <b>9.78</b>  |
| lectin protein kinase, putative similar to | LECRKA4.1  | <b>9.75</b>  |
| ABC transporter family protein putative    | MRP14      | <b>9.63</b>  |
| heat shock transcription factor 21         | HSF A4A    | <b>8.99</b>  |
| expressed protein [At1g58420.1]            |            | <b>8.69</b>  |
| harpin-induced family protein (YLS9) /     | YLS9       | <b>8.59</b>  |
| Arabidopsis thaliana At3g56080 mRNA        |            | <b>8.36</b>  |
| Arabidopsis thaliana GPI-anchored          |            | <b>7.92</b>  |
| FAD-binding domain-containing protein      |            | <b>7.61</b>  |
| Arabidopsis thaliana TRAM, LAG1 and        |            | <b>7.40</b>  |
| disease resistance family protein          |            | <b>7.35</b>  |
| unknown protein; BREAKING OF               | BASL       | <b>7.28</b>  |
| zinc finger (C2H2 type) family protein     |            | <b>7.21</b>  |
| HEAVY METAL ASSOCIATED                     | HIPP27     | <b>7.10</b>  |
| expressed protein [At5g64980.1]            |            | <b>7.09</b>  |
| disease resistance protein (TIR-NBS        |            | <b>6.91</b>  |
| dehydrin, putative similar to dehydrin     | ATEXLA2;   | <b>6.80</b>  |
| auxin-responsive protein-related similar   |            | <b>6.48</b>  |
| MutT/nudix family protein low similarity   | NUDT18     | <b>6.39</b>  |
| ATPURM/PUR5;                               | EMBRYO     | <b>6.32</b>  |
| Arabidopsis thaliana putative calcium-     |            | <b>6.26</b>  |
| heat shock cognate 70 kDa protein 2        | AtHsp70-2; | <b>6.22</b>  |
| Arabidopsis thaliana putative leucine-     |            | <b>6.20</b>  |
| expressed protein contains Pfam profile    |            | <b>6.13</b>  |
| myb family transcription factor (MYB66)    | ATMYB66    | <b>6.09</b>  |
| oligopeptide transporter OPT family        | YSL7       | <b>5.31</b>  |
| exostosin family protein                   |            | <b>5.27</b>  |
| curly leaf protein (CURLY LEAF) /          | CLF        | <b>4.91</b>  |
| phosphate-responsive protein, putative;    | EXL2       | <b>4.90</b>  |
| PSRP5 (PLASTID-SPECIFIC 50S                | PSRP5      | <b>4.46</b>  |
| xyloglucan:xyloglucosyl transferase,       | XTH17      | <b>4.37</b>  |
| anionic peroxidase, putative similar to    |            | <b>4.21</b>  |
| secretory protein, putative similar to     |            | <b>4.09</b>  |
| laccase, putative / diphenol oxidase,      | LAC12      | <b>3.97</b>  |
| zinc finger (C3HC4-type RING finger)       |            | <b>3.95</b>  |
| expressed protein [At1g64970.1];           | G-TMT      | <b>3.87</b>  |
| Arabidopsis thaliana uncharacterized       |            | <b>3.82</b>  |



|                                           |                |              |
|-------------------------------------------|----------------|--------------|
| Arabidopsis thaliana TIR-NBS-LRR class    |                | <b>3.66</b>  |
| cellulose synthase, catalytic subunit,    | CESA5          | <b>3.61</b>  |
| glutamate receptor family protein         | GLR2.3         | <b>3.52</b>  |
| disease resistance protein (TIR-NBS-LRR   |                | <b>3.46</b>  |
| GLUTATHIONE S-TRANSFERASE 7;              | GSTF7          | <b>3.21</b>  |
| Arabidopsis thaliana LURP-one-like        |                | <b>3.20</b>  |
| zinc finger (C2H2 type) family protein    | ZAT7           | <b>3.14</b>  |
| 1-aminocyclopropane-1-carboxylate         | ACS5; ETO2;    | <b>3.10</b>  |
| anionic peroxidase, putative similar to   | PER4           | <b>2.92</b>  |
| BME3/BME3-ZF (BLUE MICROPYLAR             | BME3           | <b>2.86</b>  |
| cytochrome P450, putative similar to      | CYP81F2        | <b>2.85</b>  |
| mepirin and TRAF homology domain-         |                | <b>2.80</b>  |
| transposable element gene                 |                | <b>2.74</b>  |
| Expressed protein [At1g07985.1]           |                | <b>2.66</b>  |
| aspartyl protease family protein contains |                | <b>2.60</b>  |
| expressed protein [At3g26470.1]           |                | <b>2.45</b>  |
| Arabidopsis thaliana calcium-dependent    |                | <b>2.39</b>  |
| Arabidopsis thaliana AGC (cAMP-           |                | <b>2.33</b>  |
| chitinase, putative similar to chitinase  |                | <b>2.30</b>  |
| GDSL-motif lipase/hydrolase family        |                | <b>2.25</b>  |
| dual specificity protein phosphatase 1E;  | DSPTP1E; IBR5  | <b>2.24</b>  |
| Arabidopsis thaliana GDSL                 |                | <b>2.23</b>  |
| receptor-like protein kinase 4, putative  | RLK4;CYSTEINE- | <b>2.22</b>  |
| short-chain dehydrogenase/reductase       | ATKCR2;BETA-   | <b>2.21</b>  |
| ARABIDOPSIS THALIANA GLUATIONE S-         | GSTF6          | <b>2.09</b>  |
| unknown protein;GOLVEN 1; CLE-LIKE 6;     | RGF6           | <b>-0.20</b> |
| leucine-rich repeat transmembrane         | LRR1           | <b>-0.47</b> |
| myb family transcription factor (MYB74)   | MYB74          | <b>-0.53</b> |
| auxin-responsive family protein Similar   |                | <b>-0.55</b> |
| amino acid transporter family protein     |                | <b>-0.58</b> |
| Arabidopsis thaliana ethylene-responsive  |                | <b>-0.65</b> |
| Arabidopsis thaliana cysteine/histidine-  |                | <b>-0.66</b> |
| Arabidopsis thaliana uncharacterized      |                | <b>-0.88</b> |
| homeobox-leucine zipper protein 3         | HAT3           | <b>-0.97</b> |
| PLA IVA/PLP1; nutrient reservoir;         | PLP1; BEH2     | <b>-0.97</b> |
| Arabidopsis thaliana uncharacterized      |                | <b>-1.01</b> |
| xyloglucan:xyloglucosyl transferase,      |                | <b>-1.09</b> |
| homocysteine S-methyltransferase 1        | HMT-1          | <b>-1.11</b> |
| pathogenesis-related protein, putative    |                | <b>-1.27</b> |
| FAD-binding domain-containing protein /   | CKX5           | <b>-1.31</b> |
| hypothetical protein [At2g25780.1]        |                | <b>-1.74</b> |
| legume lectin family protein contains     |                | <b>-1.78</b> |
| similar to unknown protein [Arabidopsis   |                | <b>-1.88</b> |
| Arabidopsis thaliana glycine-rich protein |                | <b>-2.04</b> |
| glycosyl transferase family 2 protein     | CSLC12         | <b>-2.10</b> |

|                                            |              |              |
|--------------------------------------------|--------------|--------------|
| protease inhibitor/seed storage/lipid      |              | <b>-2.12</b> |
| auxin-responsive family protein similar    |              | <b>-2.21</b> |
| BR6OX2/CYP85A2 (BRASSINOSTEROID-6-         | BR6OX2       | <b>-2.31</b> |
| Arabidopsis thaliana uncharacterized       |              | <b>-2.36</b> |
| U-box domain-containing protein            | PUB25        | <b>-2.55</b> |
| expressed protein [At3g01516.1]            |              | <b>-2.62</b> |
| 1,2-diacylglycerol 3-beta-                 | MONOGALACT   | <b>-2.71</b> |
| Arabidopsis thaliana SAUR-like auxin-      |              | <b>-2.74</b> |
| expressed protein [At5g01015.1]            |              | <b>-2.82</b> |
| expressed protein contains Pfam profile    |              | <b>-2.88</b> |
| JAS1/JAZ10/TIFY9 (JASMONATE-ZIM-           | JAZ10        | <b>-3.23</b> |
| ethylene-responsive element-binding        | EREBP; ERF13 | <b>-3.32</b> |
| UDP-glucuronosyl/UDP-glucosyl              | UDP-GLUCOSYL | <b>-3.33</b> |
| exostosin family protein contains Pfam     | F8H          | <b>-3.33</b> |
| xyloglucan:xyloglucosyl transferase /      | XTR2         | <b>-3.37</b> |
| Arabidopsis thaliana peroxidase 62         |              | <b>-3.44</b> |
| Arabidopsis thaliana uncharacterized       |              | <b>-3.45</b> |
| methionine sulfoxide reductase domain-     | MSRB9        | <b>-3.58</b> |
| disease resistance-responsive protein-     |              | <b>-3.59</b> |
| invertase/pectin methylesterase            |              | <b>-3.63</b> |
| DC1 domain-containing protein contains     |              | <b>-3.64</b> |
| DNAJ heat shock N-terminal domain-         |              | <b>-3.65</b> |
| myb family transcription factor similar to | MYB112       | <b>-3.73</b> |
| protease inhibitor/seed storage/lipid      |              | <b>-3.79</b> |
| ANAC102 (Arabidopsis NAC domain            | NAC102       | <b>-3.79</b> |
| Arabidopsis thaliana tolB-related protein  |              | <b>-3.79</b> |
| AAA-type ATPase family protein contains    |              | <b>-3.82</b> |
| expressed protein contains Pfam profile    |              | <b>-3.82</b> |
| heavy-metal-associated domain-             |              | <b>-3.85</b> |
| WRKY59 (WRKY DNA-binding protein 59);      | WRKY59       | <b>-3.88</b> |
| expressed protein [At1g68440.1]            |              | <b>-3.88</b> |
| Arabidopsis thaliana cystathionine beta-   |              | <b>-3.90</b> |
| hydroxyproline-rich glycoprotein family    |              | <b>-3.91</b> |
| SKS5 (SKU5 Similar 5); copper ion binding  | sks5         | <b>-3.95</b> |
| Arabidopsis thaliana peroxidase 9          |              | <b>-3.96</b> |
| germin-like protein (GLP9) identical to    | GLP9         | <b>-4.06</b> |
| Arabidopsis thaliana putative chitinase    |              | <b>-4.08</b> |
| expressed protein contains Pfam profile    |              | <b>-4.10</b> |
| succinyl-CoA ligase [GDP-forming] beta-    |              | <b>-4.11</b> |
| xyloglucan:xyloglucosyl transferase,       |              | <b>-4.12</b> |
| metal transporter, putative (ZIP9)         |              | <b>-4.16</b> |
| Arabidopsis thaliana Proline-rich          |              | <b>-4.16</b> |
| DNAJ heat shock N-terminal domain-         |              | <b>-4.26</b> |
| ovate family protein 59% similar to        | OFP1         | <b>-4.37</b> |
| Arabidopsis thaliana bifunctional          |              | <b>-4.39</b> |

|                                           |              |              |
|-------------------------------------------|--------------|--------------|
| WRKY family transcription factor DNA-     | WRKY70       | <b>-4.43</b> |
| PBS3 (AVRPPHB SUSCEPTIBLE 3);             | PBS3         | <b>-4.43</b> |
| expressed protein [At5g49100.1]           |              | <b>-4.46</b> |
| expressed protein [At1g72240.1]           |              | <b>-4.46</b> |
| multi-copper oxidase type I family        | sks2         | <b>-4.50</b> |
| AGP13 (ARABINO GALACTAN PROTEIN           | AGP13        | <b>-4.53</b> |
| Arabidopsis thaliana PAK-box/P21-Rho-     |              | <b>-4.62</b> |
| expressed protein [At5g59510.1]; DEVIL    | DVL18; RTFL5 | <b>-4.62</b> |
| transferase family protein similar to     |              | <b>-4.64</b> |
| GDSL-motif lipase/hydrolase family        |              | <b>-4.67</b> |
| trehalose-6-phosphate phosphatase,        | TPPF         | <b>-4.68</b> |
| expressed protein [At4g14450.1]           |              | <b>-4.72</b> |
| Arabidopsis thaliana uncharacterized      |              | <b>-4.75</b> |
| amino acid permease, putative similar to  | LAX3         | <b>-4.80</b> |
| glycosyl hydrolase family 17 protein      |              | <b>-4.82</b> |
| 4CL1 (4-COUMARATE:COA LIGASE 1); 4-       | 4CL1         | <b>-4.85</b> |
| root cap 1 (RCP1) identical to            | RCP1         | <b>-5.03</b> |
| AtNUDT7 (ARABIDOPSIS THALIANA             | NUDT7        | <b>-5.04</b> |
| expressed protein [At3g60650.1]           |              | <b>-5.10</b> |
| Arabidopsis thaliana transcription factor |              | <b>-5.12</b> |
| Arabidopsis thaliana plastocyanin-like    |              | <b>-5.16</b> |
| cytochrome P450, putative                 | CYP96A1      | <b>-5.18</b> |
| F-box family protein contains             |              | <b>-5.22</b> |
| protein phosphatase 2C family protein /   |              | <b>-5.30</b> |
| expressed protein [At5g65300.1]           |              | <b>-5.37</b> |
| Arabidopsis thaliana uncharacterized      |              | <b>-5.43</b> |
| expansin, putative (EXP12) similar to     | ATEXPA12;    | <b>-5.45</b> |
| expressed protein [At5g66985.1]           |              | <b>-5.56</b> |
| UDP-glucuronosyl/UDP-glucosyl             | UDP-GLUCOSYL | <b>-5.74</b> |
| DC1 domain-containing protein contains    |              | <b>-5.75</b> |
| expressed protein contains Pfam profile   |              | <b>-5.87</b> |
| cytochrome P450, putative                 | PHYB         | <b>-5.89</b> |
| receptor-like protein kinase-related      |              | <b>-5.89</b> |
| expansin family protein (EXPL2) contains  | 1-AMINO-     | <b>-5.93</b> |
| expressed protein [At1g29270.1]           |              | <b>-5.97</b> |
| remorin family protein contains Pfam      |              | <b>-5.99</b> |
| AP2 domain-containing transcription       | PUCHI        | <b>-6.06</b> |
| extracellular dermal glycoprotein-related |              | <b>-6.31</b> |
| auxin-responsive GH3 family protein       | GH3.1        | <b>-6.33</b> |
| xyloglucan:xyloglucosyl transferase,      | XTR8         | <b>-6.37</b> |
| BLH6 (BELL1-LIKE HOMEODOMAIN 5);          | BLH6         | <b>-6.47</b> |
| expressed protein contains Pfam profile   |              | <b>-6.58</b> |
| glycosyl transferase family 2 protein     | CSLA14       | <b>-6.61</b> |
| Arabidopsis thaliana uncharacterized      |              | <b>-6.79</b> |
| adenylate isopentenyltransferase 3 /      | IPT3         | <b>-6.97</b> |

|                                            |              |               |
|--------------------------------------------|--------------|---------------|
| annexin 3 (ANN3) nearly identical to       | ANN3         | <b>-7.01</b>  |
| protease inhibitor/seed storage/lipid      |              | <b>-7.06</b>  |
| AP2 domain-containing transcription        | ATERF53;ERF  | <b>-7.12</b>  |
| cytochrome P450, putative similar to       | CYP90D1      | <b>-7.16</b>  |
| glycosyl hydrolase family 9 protein        | GH9B8        | <b>-7.30</b>  |
| RNA cyclase family protein contains        |              | <b>-7.37</b>  |
| short-chain dehydrogenase/reductase        | AtHSD4       | <b>-7.57</b>  |
| short-chain dehydrogenase/reductase        |              | <b>-7.82</b>  |
| expressed protein ; expression             |              | <b>-7.88</b>  |
| U-box domain-containing protein similar    | PUB29        | <b>-8.46</b>  |
| ankyrin repeat family protein contains     |              | <b>-8.50</b>  |
| mepirin and TRAF homology domain-          |              | <b>-8.72</b>  |
| zinc finger (C3HC4-type RING finger)       |              | <b>-8.84</b>  |
| inositol-3-phosphate synthase isozyme 1    | MIPS1        | <b>-9.05</b>  |
| PHI-1 (PHOSPHATE-INDUCED 1)                | PHI-1        | <b>-9.35</b>  |
| TCH3 (TOUCH 3)                             | TCH3         | <b>-9.53</b>  |
| peroxidase, putative similar to            |              | <b>-9.86</b>  |
| cytochrome P450, putative similar to       | BR6OX1       | <b>-9.92</b>  |
| auxin-responsive family protein similar    |              | <b>-9.92</b>  |
| U-box domain-containing protein low        |              | <b>-10.34</b> |
| CBL-interacting protein kinase 13          | CIPK13;      | <b>-10.77</b> |
| leucine-rich repeat family protein         | RLP29        | <b>-10.85</b> |
| expressed protein [At5g22580.1]            |              | <b>-12.29</b> |
| universal stress protein (USP) family      |              | <b>-12.54</b> |
| UGT73B4; UDP-glycosyltransferase/          | UGT73B4      | <b>-12.69</b> |
| expressed protein [At5g15120.1]            |              | <b>-12.78</b> |
| expressed protein similar to myo-inositol  | CIL          | <b>-13.25</b> |
| arabinogalactan-protein, putative          | AGP22        | <b>-17.04</b> |
| pyruvate decarboxylase, putative strong    | ATZIP9; ZIP9 | <b>-17.36</b> |
| xyloglucan:xyloglucosyl transferase /      | XTH22; TCH4  | <b>-18.85</b> |
| proline oxidase, putative / osmotic stress |              | <b>-20.08</b> |
| strictosidine synthase family protein      |              | <b>-26.37</b> |
| expressed protein similar to unknown       |              | <b>-26.55</b> |
| pentacyclic triterpene synthase, putative  | THAS1        | <b>-36.83</b> |
| expressed protein wound-inducible          |              | <b>-48.95</b> |
| similar to unknown protein [Arabidopsis    |              | <b>-50.13</b> |

color key

downregulated

unchanged

lown-regulation increased

own-regulation decreased

p/down-regulation lost

**Genes involved in BR-response**

| Gene_ID         | Representative Public ID | 0% Glc + 100 nM BR vs 0% Glc | 3% Glc vs 0% Glc | 3% Glc + 100 nM BR vs 0% Glc |
|-----------------|--------------------------|------------------------------|------------------|------------------------------|
| A_84_P15205 838 | AT1G16390                | 1.37                         | -13.36           | -12.57                       |
| A_84_P19941,A_8 | AT1G17060                | 1.24                         | 2.37             | 1.63                         |
| A_84_P21523 838 | AT1G18400                | 1.43                         | -2.51            | -6.98                        |
| A_84_P12404 842 | AT1G55610                | -1.32                        | 1.90             | 1.50                         |
| A_84_P786180,A  | AT1G75750                | -1.03                        | -2.58            | -7.41                        |
| A_84_P23744,A_8 | AT1G78300                | 1.22                         | -2.15            | -1.40                        |
| A_84_P20128,A_8 | AT2G03760                | -1.02                        | 2.36             | -15.34                       |
| A_84_P14435 817 | AT2G26710                | 2.22                         | -3.39            | -3.67                        |
| A_84_P12582,A_8 | AT2G30980                | 1.25                         | 1.03             | 1.73                         |
| A_84_P10829 820 | AT3G13730                | -6.01                        | 2.47             | 1.15                         |
| A_84_P826388,A  | AT3G30180                | -4.26                        | -2.54            | -1.95                        |
| A_84_P869611,A  | AT3G50660                | -8.48                        | -1.18            | -7.55                        |
| A_84_P268280 82 | AT3G50750                | -1.34                        | -3.70            | -12.63                       |
| A_84_P18482 825 | AT3G61460                | -1.96                        | -1.25            | -5.09                        |
| A_84_P15668 828 | AT4G03080                | 1.18                         | -1.69            | -2.02                        |
| A_84_P208608 82 | AT4G18890                | 1.18                         | 3.57             | 2.46                         |
| A_84_P11031 829 | AT4G30610                | 1.07                         | 1.37             | 2.51                         |
| A_84_P123562,A  | AT4G36540                | -1.02                        | -3.80            | -3.00                        |
| A_84_P162603 82 | AT4G36780                | -2.38                        | -1.30            | -18.27                       |
| A_84_P11316 830 | AT5G04240                | 1.11                         | -1.90            | -18.45                       |
| A_84_P813697,A  | AT5G05690                | -1.74                        | -2.40            | -11.17                       |
| A_84_P795619,A  | AT5G08130                | -1.41                        | 1.77             | 2.20                         |
| A_84_P20630 833 | AT5G38970                | -14.60                       | -1.44            | -4.69                        |
| A_84_P17859 835 | AT5G57560                | 3.36                         | -12.77           | -15.49                       |
| A_84_P19773 836 | AT5G62380                | 1.05                         | 8.49             | 5.87                         |
| A_84_P811115,A  | AT5G65430                | 1.10                         | -1.95            | -1.42                        |

| Gene Title                                                         | Gene Symbol |
|--------------------------------------------------------------------|-------------|
| carbohydrate transmembrane transporter/ sugar:hydrogen ion         | ATOCT3      |
| cytochrome P450, family 72, subfamily C, polypeptide 1; oxygen     | CYP72C1     |
| BR ENHANCED EXPRESSION 1; transcription factor                     | BEE1        |
| BRI 1 LIKE; kinase                                                 | BRL1        |
| GAST1 PROTEIN HOMOLOG 1                                            | GASA1       |
| GENERAL REGULATORY FACTOR 2; protein phosphorylated amino          | GRF2        |
| sulfotransferase                                                   | SOT12       |
| PHYB ACTIVATION TAGGED SUPPRESSOR 1; oxygen binding /              | BAS1        |
| shaggy-related protein kinase delta / ASK-delta / ASK-dzeta (ASK4) | SKdZeta     |
| CYTOCHROME P450, FAMILY 90, SUBFAMILY D, POLYPEPTIDE 1;            | CYP90D1     |
| BRASSINOSTEROID-6-OXIDASE 2; monooxygenase/ oxygen                 | BR6OX2      |
| DWARF 4                                                            | DWF4        |
| brassinosteroid signalling positive regulator-related              |             |
| BRASSINOSTEROID-RESPONSIVE RING-H2; protein binding / zinc         | BRH1        |
| kelch repeat-containing serine/threonine phosphoesterase family    |             |
| brassinosteroid signalling positive regulator-related              | BEH3        |
| BRI1 SUPPRESSOR 1                                                  | BRS1        |
| BR ENHANCED EXPRESSION 2; DNA binding / transcription factor       | BEE2        |
| brassinosteroid signalling positive regulator-related              |             |
| EARLY FLOWERING 6; transcription factor                            | ELF6        |
| CPD (CABBAGE 3); oxygen binding                                    | CPD         |
| BES1-interacting Myc-like protein 1; DNA binding / transcription   | BIM1        |
| BRASSINOSTEROID-6-OXIDASE; oxygen binding                          | BR6OX1      |
| xyloglucan:xyloglucosyl transferase                                | TCH4        |
| VASCULAR-RELATED NAC-DOMAIN 6; transcription factor                | VND6        |
| GENERAL REGULATORY FACTOR 8; protein phosphorylated amino          | GRF8        |

upregulated

color key

downregulated

unchanged



**BR-Glc regulated genes involved in various phytohormone respon**

| <i>Hormone category</i> | <i>AGI</i> | <i>0% Glc+100 nM BR vs 0% Glc</i> | <i>3% Glc vs 0% Glc</i> | <i>3% Glc+100 nM BR vs 0% Glc</i> |
|-------------------------|------------|-----------------------------------|-------------------------|-----------------------------------|
| <b>Auxin</b>            | AT1G53700  | 2.39                              | 3.58                    | 14.54                             |
|                         | AT2G04550  | -7.04                             | -18.33                  | -9.28                             |
|                         | AT2G14960  | 8.03                              | -1.06                   | 1.7                               |
|                         | AT2G28085  | 3.22                              | -1.75                   | 1.37                              |
|                         | AT2G37030  | -4.6                              | -5.16                   | 5.32                              |
|                         | AT3G15540  | 2.75                              | -1.22                   | 2.26                              |
|                         | AT4G14560  | -2.67                             | -3.41                   | -16.52                            |
|                         | AT4G36110  | 3.89                              | -3.21                   | 2.18                              |
|                         | AT5G13320  | 6.22                              | -1.18                   | 1.79                              |
|                         | AT5G18560  | -9.13                             | 1.07                    | -3.07                             |
|                         | AT5G57560  | 3.36                              | -12.77                  | -15.49                            |
| <b>Cytokinin</b>        | AT1G75450  | -2.79                             | -3.05                   | -3.22                             |
|                         | AT3G63110  | -2.27                             | 5.7                     | 4.69                              |
|                         | AT5G65800  | 4.67                              | 1.29                    | 7.77                              |
|                         | AT2G15120  | 2.85                              | 6.2                     | 6.94                              |
| <b>ABA</b>              | AT4G11890  | 2.23                              | -1.07                   | 2.47                              |
|                         | AT5G01540  | 3.3                               | 5.35                    | 13.06                             |
|                         | AT5G01550  | 3.22                              | 6.5                     | 20.39                             |
|                         | AT5G13320  | 6.22                              | -1.18                   | 1.79                              |
| <b>Ethylene</b>         | AT5G18560  | -9.13                             | 1.07                    | -3.07                             |
|                         | AT1G01480  | -2.83                             | 1.67                    | -1.04                             |
|                         | AT2G44840  | 7.3                               | 1.99                    | 3.98                              |
|                         | AT4G05100  | -2.06                             | 2.07                    | -2.37                             |
|                         | AT4G37770  | 3.46                              | -1.06                   | 4.19                              |
|                         | AT5G25190  | 2.87                              | 3.07                    | 19.1                              |
|                         | AT5G51190  | 2.21                              | -1.54                   | 1.03                              |
|                         | AT5G65800  | 4.67                              | 1.29                    | 7.77                              |
| <b>JA</b>               | AT4G05100  | -2.06                             | 2.07                    | -2.37                             |
|                         | AT5G13220  | 2.07                              | -2.59                   | -1.16                             |
|                         | AT3G56400  | 2.48                              | -3.09                   | -1.95                             |

ses.

| <i>Gene Title</i>                                    | <i>Gene Symbol</i> |
|------------------------------------------------------|--------------------|
| protein kinase                                       | WAG1               |
| dual specificity protein phosphatase family protein  | IBR5               |
| auxin-responsive GH3 family protein                  | GH3.1              |
| auxin-responsive family protein                      |                    |
| auxin-responsive family protein                      |                    |
| auxin-responsive protein                             | IAA19              |
| auxin-responsive protein                             | IAA1               |
| SAUR-like auxin-responsive protein                   |                    |
| auxin-responsive GH3 family protein                  | PBS3               |
| AP2 domain-containing transcription factor, putative | PUCHI              |
| xyloglucan:xyloglucosyl transferase                  | TCH4               |
| cytokinin oxidase family protein                     | CKX5               |
| adenylate isopentenyltransferase 3                   | ATIPT3             |
| 1-aminocyclopropane-1-carboxylate synthase           | ACS5               |
| secretory protein                                    |                    |
| protein kinase family protein                        |                    |
| lectin protein kinase                                |                    |
| lectin protein kinase                                |                    |
| auxin-responsive GH3 family protein                  | PBS3               |
| AP2 domain-containing transcription factor           | PUCHI              |
| 1-aminocyclopropane-1-carboxylate synthase 2         | ACS2               |
| ethylene-responsive element-binding protein          | ATERF13            |
| myb family transcription factor                      | AtMYB74            |
| 1-aminocyclopropane-1-carboxylate synthase           | ACS8               |
| ethylene-responsive element-binding protein          |                    |
| AP2 domain-containing transcription factor           | ERF105             |
| 1-aminocyclopropane-1-carboxylate synthase           | ACS5               |
| myb family transcription factor                      | AtMYB74            |
| JASMONATE-ZIM-DOMAIN PROTEIN 10                      | JAZ10              |
| WRKY family transcription factor                     | WRKY70             |

BR-regulated genes involved in stress responses.

| Gene_ID                        | Representative Public ID | 0% Glc + 100 nM BR vs 0% Glc | 3% Glc vs 0% Glc | 3% Glc + 100 nM BR vs 0% Glc |
|--------------------------------|--------------------------|------------------------------|------------------|------------------------------|
| A_84_P251265,A_84_P21159 81955 | AT1G63720                | -4.14                        | 1.26             | -1.79                        |
| A_84_P22215 82412              | AT3G04010                | -3.75                        | 1.90             | 1.07                         |
| A_84_P816739,A_84_P511454 8343 | AT3G49630                | -3.12                        | -1.35            | -1.54                        |
| A_84_P18845 84121              | AT1G44970                | -2.67                        | -1.28            | 1.29                         |
| A_84_P20724,A_84_P262520 8356  | AT5G43570                | -2.67                        | -15.35           | -24.80                       |
| A_84_P19256 82007              | AT1G48000                | -2.37                        | 1.88             | 1.37                         |
| A_84_P12484 84218              | AT5G63790                | -2.31                        | 4.19             | 1.48                         |
| A_84_P16321 81656              | AT5G55620                | -2.31                        | 10.48            | 24.24                        |
| A_84_P22388 82944              | AT3G09220                | -2.29                        | -9.86            | -20.91                       |
| A_84_P10949 82585              | AT1G58170                | -2.22                        | 10.87            | 1.37                         |
| A_84_P15423 81689              | AT2G20420                | -2.17                        | 1.49             | 1.95                         |
| A_84_P824506,A_84_P16948 83670 | AT4G33070                | -2.16                        | 17.22            | 15.20                        |
| A_84_P16807 83164              | AT4G05100                | -2.06                        | 2.07             | -2.37                        |
| A_84_P302000 8354              | AT2G23620                | -2.05                        | -9.34            | -24.54                       |
| A_84_P853187,A_84_P12725 82248 | AT1G51680                | -2.05                        | 1.88             | 2.80                         |
| A_84_P14776 82841              | AT5G65730                | -2.02                        | -110.66          | -36.27                       |
| A_84_P524680,A_84_P807670      | AT5G17760                | -2.01                        | 4.79             | 1.80                         |
| A_84_P13482 81845              | AT5G53250                | 2.01                         | -14.19           | -15.03                       |
| A_84_P16848,A_84_P14776 82841  | AT4G34150                | 2.03                         | 1.93             | 4.42                         |
| A_84_P12725 82248              | AT3G28510                | 2.04                         | 19.37            | 21.18                        |
| A_84_P16848,A_84_P14776 82841  | AT5G39580                | 2.05                         | -2.19            | -1.39                        |
| A_84_P14776 82841              | AT4G23180                | 2.07                         | 2.21             | 4.29                         |
| A_84_P524680,A_84_P807670      | AT5G13220                | 2.07                         | -2.59            | -1.16                        |
| A_84_P13482 81845              | AT3G53990                | 2.07                         | 1.28             | -10.47                       |
| A_84_P528136,A_84_P16226 83801 | AT2G38760                | 2.08                         | 3.63             | -4.93                        |
| A_84_P16226 83801              | AT4G23190                | 2.09                         | 3.83             | 3.61                         |
| A_84_P17749 83136              | AT1G14540                | 2.14                         | 3.86             | 5.06                         |
| A_84_P233559 8375              | AT5G15120                | 2.15                         | 1.01             | -10.63                       |
| A_84_P12547 81762              | AT1G10340                | 2.17                         | -9.80            | -6.34                        |
| A_84_P12960 82711              | AT2G30750                | 2.19                         | 32.94            | 11.97                        |
| A_84_P22181 82244              | AT4G14630                | 2.20                         | -3.61            | -1.86                        |
| A_84_P296724,A_84_P19534 82905 | AT3G28210                | 2.21                         | 23.22            | 25.81                        |
| A_84_P827321,A_84_P18119 84274 | AT5G51190                | 2.21                         | -1.54            | 1.03                         |
| A_84_P18119 84274              | AT4G29340                | 2.22                         | 4.04             | 3.89                         |
| A_84_P22847 83801              | AT4G11890                | 2.23                         | -1.07            | 2.47                         |
| A_84_P13130 83582              | AT1G64400                | 2.23                         | 1.00             | 1.80                         |
| A_84_P74914 81825              | AT1G14550                | 2.24                         | 12.93            | 6.45                         |
| A_84_P15464 82119              | AT5G57220                | 2.25                         | 12.62            | 5.10                         |
| A_84_P19706 83453              | AT2G36840                | 2.26                         | 2.23             | 3.36                         |
| A_84_P23919 81817              | AT3G03670                | 2.32                         | -27.10           | -7.54                        |
| A_84_P16571 82480              | AT5G45000                | 2.32                         | 1.55             | 2.39                         |
|                                | AT2G35980                | 2.40                         | 17.21            | 10.99                        |
|                                | AT3G56400                | 2.48                         | -3.09            | -1.95                        |

|                   |           |       |        |        |
|-------------------|-----------|-------|--------|--------|
| A_84_P15741 82883 | AT4G27280 | 2.49  | -1.31  | 2.07   |
| A_84_P801239,A_84 | AT1G02920 | 2.53  | 4.53   | 5.73   |
| A_84_P90109 81974 | AT3G05800 | 2.53  | 1.49   | 4.42   |
| A_84_P17597 82762 | AT4G18880 | 2.62  | 7.74   | 11.60  |
| A_84_P15946 83521 | AT5G51440 | 2.64  | 37.76  | 3.92   |
| A_84_P12956 83014 | AT4G39830 | 2.66  | -1.29  | 3.15   |
| A_84_P22053,A_84  | AT2G41100 | 2.68  | -4.04  | -6.85  |
| A_84_P20237 83918 | AT1G26420 | 2.74  | 10.06  | 10.35  |
| A_84_P157715 8436 | AT1G72930 | 2.74  | 20.54  | 26.13  |
| A_84_P812454,A_84 | AT1G02930 | 2.80  | 4.12   | 4.90   |
| A_84_P61660 81601 | AT2G15220 | 2.85  | 6.20   | 6.94   |
| A_84_P813874,A_84 | AT4G12720 | 2.87  | 1.33   | -2.17  |
| A_84_P20998,A_84  | AT1G35140 | 2.92  | -20.48 | -6.43  |
| A_84_P825802,A_84 | AT5G25250 | 2.93  | 2.20   | 3.20   |
| A_84_P556555 8318 | AT5G02490 | 3.10  | 5.86   | 9.32   |
| A_84_P19294,A_84  | AT1G26380 | 3.10  | 41.95  | 40.12  |
| A_84_P16369 81687 | AT2G23380 | 3.14  | 4.26   | 8.05   |
| A_84_P13393 84292 | AT1G66090 | 3.16  | 9.50   | 10.06  |
| A_84_P23380 83172 | AT5G01540 | 3.30  | 5.35   | 13.06  |
| A_84_P17859 83586 | AT5G57560 | 3.36  | -12.77 | -15.49 |
| A_84_P11613 81805 | AT2G34930 | 3.37  | 1.85   | 10.71  |
| A_84_P11694,A_84  | AT3G01830 | 3.38  | 6.39   | 9.64   |
| A_84_P17815 83455 | AT5G45200 | 3.38  | 2.48   | 6.84   |
| A_84_P79989 82907 | AT4G29520 | 3.43  | 7.41   | 15.46  |
| A_84_P19231 81715 | AT2G26150 | 3.66  | 75.17  | 91.66  |
| A_84_P13475 81565 | AT2G11810 | 3.74  | 2.05   | 2.00   |
| A_84_P13077,A_84  | AT5G42380 | 3.98  | 10.22  | 15.09  |
| A_84_P10559 83952 | AT1G01560 | 4.05  | 8.02   | 5.59   |
| A_84_P786490,A_84 | AT2G46400 | 4.23  | 2.63   | 5.39   |
| A_84_P10627 81662 | AT2G20880 | 5.02  | -3.87  | -2.10  |
| A_84_P18737 83386 | AT5G38710 | 5.65  | -10.48 | -14.44 |
| A_84_P23478,A_84  | AT5G41750 | 5.86  | 7.00   | 9.52   |
| A_84_P17343 81909 | AT2G44840 | 7.30  | 1.99   | 3.98   |
| A_84_P16097 83902 | AT1G24140 | 10.84 | 13.42  | 24.87  |

| GeneName                                                                                           | GeneSymbol |
|----------------------------------------------------------------------------------------------------|------------|
| hypothetical protein                                                                               |            |
| glycosyl hydrolase family 17                                                                       |            |
| 2-oxoacid-dependent oxidase,<br>peroxidase 9                                                       |            |
| serine protease inhibitor, potato                                                                  |            |
| myb family transcription factor                                                                    |            |
| NAC domain-containing protein                                                                      | NAC102     |
| expressed protein similar to<br>laccase family protein / diphenol<br>disease resistance-responsive |            |
| succinyl-CoA ligase [GDP-<br>pyruvate decarboxylase, putative                                      |            |
| myb family transcription factor                                                                    |            |
| esterase, putative similar to                                                                      |            |
| 4-coumarate--CoA ligase 1                                                                          | 4CL1       |
| xyloglucan:xyloglucosyl<br>AAA-type ATPase family protein                                          |            |
| arabinogalactan-protein, putative                                                                  |            |
| calcium-dependent lipid-binding<br>AAA-type ATPase family protein                                  |            |
| peroxidase 62                                                                                      |            |
| receptor-like protein kinase 4,<br>protein TIFY 9                                                  | JAZ10      |
| universal stress protein (USP)                                                                     |            |
| annexin 3 (ANN3) nearly identical                                                                  |            |
| cysteine-rich receptor-like                                                                        | CRK11      |
| anionic peroxidase, putative                                                                       |            |
| expressed protein [At5g15120.1]                                                                    |            |
| ankyrin repeat family protein                                                                      |            |
| cytochrome P450 71A12,<br>germin-like protein (GLP9)                                               |            |
| zinc finger (AN1-like) family                                                                      |            |
| ethylene-responsive transcription                                                                  |            |
| profilin 3 (PRO3) (PFN3) identical                                                                 |            |
| ABA- AND OSMOTIC-STRESS-<br>long-chain-fatty-acid--CoA ligase,                                     | ARCK1      |
| anionic peroxidase, putative                                                                       |            |
| cytochrome P450, putative                                                                          |            |
| ACT domain-containing protein                                                                      |            |
| peroxidase, putative similar to                                                                    |            |
| Toll-Interleukin-Resistance (TIR)                                                                  |            |
| harpin-induced family protein                                                                      |            |
| WRKY family transcription factor                                                                   |            |

| color key   |               |
|-------------|---------------|
| upregulated | downregulated |

|                                    |        |
|------------------------------------|--------|
| calcium-binding EF hand family     |        |
| glutathione S-transferase 11       | GSTF7  |
| expressed protein [At3g05800.1]    |        |
| heat shock transcription factor 21 |        |
| 23.5 kDa mitochondrial small       |        |
| L-ascorbate oxidase, putative      |        |
| calmodulin-like protein 12         | TCH3   |
| FAD-binding domain-containing      |        |
| Toll-Interleukin-Resistance (TIR)  |        |
| glutathione S-transferase 1        | GSTF6  |
| secretory protein, putative        |        |
| nudix hydrolase 7                  | NUDT7  |
| Phosphate-responsive 1-like        | PHI-1  |
| Flotillin-like protein 1           |        |
| heat shock cognate 70 kDa          |        |
| FAD-binding and BBE domain-        |        |
| curly leaf protein (CURLY LEAF) /  |        |
| disease resistance protein (TIR-   |        |
| lectin protein kinase, putative    |        |
| xyloglucan:xyloglucosyl            |        |
| disease resistance family protein  |        |
| putative calcium-binding protein   |        |
| disease resistance protein (TIR-   |        |
| expressed protein [At4g29520.1]    |        |
| heat shock transcription factor    |        |
| 1,2-diacylglycerol 3-beta-         |        |
| calcium-binding protein CML37      | CML37  |
| mitogen-activated protein kinase,  |        |
| putative WRKY transcription        | WRKY46 |
| AP2 domain-containing              |        |
| proline oxidase, putative /        |        |
| TIR-NBS-LRR class disease          |        |
| ethylene-responsive element-       |        |
| matrixin family protein similar to |        |

|           |
|-----------|
|           |
| unchanged |

**List of enriched cis-regulatory elements in promoters of BR-regulated and BR-Glc coregulated**

| <b>Category</b>                                                                                          | <b>Enriched TF sites name</b> | <b>P-value</b> |
|----------------------------------------------------------------------------------------------------------|-------------------------------|----------------|
| <b>BR regulated genes (303)</b>                                                                          | TATA-box motif                | $<10^{-10}$    |
|                                                                                                          | AtMYC2 BS in RD22             | $<10^{-8}$     |
|                                                                                                          | MYCATERD1                     | $<10^{-8}$     |
|                                                                                                          | CARGCW8GAT                    | $<10^{-6}$     |
|                                                                                                          | W-box promoter motif          | $<10^{-5}$     |
|                                                                                                          | GAREAT                        | $<10^{-4}$     |
|                                                                                                          | ARF binding site motif        | $<10^{-3}$     |
|                                                                                                          | DREB1A/CBF3                   | $<10^{-3}$     |
| MYB4 binding site motif                                                                                  | $<10^{-3}$                    |                |
| <b>BR up-regulated genes (190)</b>                                                                       | TATA-box motif                | $<10^{-7}$     |
|                                                                                                          | AtMYC2 BS in RD22             | $<10^{-5}$     |
|                                                                                                          | MYCATERD1                     | $<10^{-5}$     |
|                                                                                                          | CARGCW8GAT                    | $<10^{-4}$     |
|                                                                                                          | W-box promoter motif          | $<10^{-4}$     |
|                                                                                                          | GAREAT                        | $<10^{-3}$     |
|                                                                                                          | MYB4 binding site motif       | $<10^{-3}$     |
| <b>BR down-regulated genes (113)</b>                                                                     | CACGTGMOTIF                   | $<10^{-7}$     |
|                                                                                                          | ABRE-like binding site motif  | $<10^{-5}$     |
|                                                                                                          | ABFs binding site motif       | $<10^{-3}$     |
|                                                                                                          | ABRE binding site motif       | $<10^{-3}$     |
|                                                                                                          | AtMYC2 BS in RD22             | $<10^{-3}$     |
|                                                                                                          | GBOXLERBCS                    | $<10^{-3}$     |
|                                                                                                          | MYCATERD1                     | $<10^{-3}$     |
| TATA-box motif                                                                                           | $<10^{-3}$                    |                |
| <b>BR regulated genes up- and down-regulated by Glc alone (217)</b>                                      | TATA-box motif                | $<10^{-7}$     |
|                                                                                                          | GAREAT                        | $<10^{-5}$     |
|                                                                                                          | ABRE binding site motif       | $<10^{-4}$     |
|                                                                                                          | AtMYC2 BS in RD22             | $<10^{-4}$     |
|                                                                                                          | CARGCW8GAT                    | $<10^{-4}$     |
|                                                                                                          | MYCATERD1                     | $<10^{-4}$     |
| ABFs binding site motif                                                                                  | $<10^{-3}$                    |                |
| <b>Genes synergistically regulated by BR and Glc alone (125)</b>                                         | GAREAT                        | $<10^{-3}$     |
|                                                                                                          | TATA-box motif                | $<10^{-3}$     |
| <b>Genes antagonistically regulated by BR and Glc alone (92)</b>                                         | AtMYC2 BS in RD22             | $<10^{-4}$     |
|                                                                                                          | MYCATERD1                     | $<10^{-4}$     |
|                                                                                                          | TATA-box motif                | $<10^{-4}$     |
| <b>BR-regulation of genes affected (2 fold more/less or lost) significantly in presence of Glc (256)</b> | AtMYC2 BS in RD22             | $<10^{-7}$     |
|                                                                                                          | MYCATERD1                     | $<10^{-7}$     |
|                                                                                                          | TATA-box motif                | $<10^{-7}$     |
|                                                                                                          | CARGCW8GAT                    | $<10^{-4}$     |
|                                                                                                          | ABRE-like binding site motif  | $<10^{-3}$     |
|                                                                                                          | ARF binding site motif        | $<10^{-3}$     |
|                                                                                                          | GAREAT                        | $<10^{-3}$     |
| W-box promoter motif                                                                                     | $<10^{-3}$                    |                |



|                                                                                                                      |                                                                |                                                                                  |
|----------------------------------------------------------------------------------------------------------------------|----------------------------------------------------------------|----------------------------------------------------------------------------------|
| <b>BR-regulation of genes affected synergistically (2 fold or more up) in presence of Glc (110)</b>                  | No enriched binding factors found                              |                                                                                  |
| <b>Extent of BR regulated genes affected antagonistically (2 fold or more down or lost) in presence of Glc (146)</b> | AtMYC2 BS in RD22<br>MYCATERD1<br>TATA-box motif<br>CARGCW8GAT | <10 <sup>-5</sup><br><10 <sup>-5</sup><br><10 <sup>-5</sup><br><10 <sup>-4</sup> |

**genes in dark grown Arabidopsis seedlings**

List of BR-regulated genes involved in hypocotyl growth and development.

| Representative Public ID | 0% Glc + 100 nM BR vs. 0% Glc | 3% Glc vs. 0% Glc | 3% Glc + 100 nM BR vs. 0% Glc | Gene Description                          |
|--------------------------|-------------------------------|-------------------|-------------------------------|-------------------------------------------|
| AT4G14630                | 2.20                          | -3.61             | -1.86                         | germin-like protein (GLP9)                |
| AT4G14560                | -2.67                         | -3.41             | -16.52                        | auxin-responsive protein                  |
| AT2G26710                | 2.22                          | -3.39             | -3.67                         | cytochrome P450, putative                 |
| AT3G20830                | -2.36                         | -2.90             | -4.69                         | cAMP-/ cGMP-dependent protein kinase C    |
| AT5G19110                | 4.51                          | -2.77             | -1.80                         | extracellular dermal glycoprotein-related |
| AT5G62340                | 2.62                          | -2.29             | -1.00                         | invertase/pectin methylesterase inhibitor |
| AT2G39430                | -2.23                         | -2.19             | -14.69                        | disease resistance-responsive protein-    |
| AT3G15540                | 2.75                          | -1.22             | 2.26                          | auxin-responsive protein                  |
| AT3G50660                | -8.48                         | -1.18             | -7.55                         | cytochrome P450 90B1                      |
| AT5G65800                | 4.67                          | 1.29              | 7.77                          | ACC synthase, putative                    |
| AT4G38410                | 2.77                          | 1.69              | 9.57                          | dehydrin, putative                        |
| AT4G22470                | -2.70                         | 2.14              | 1.09                          | protease inhibitor/seed storage/lipid     |
| AT4G28650                | 2.91                          | 3.03              | 9.11                          | leucine-rich repeat transmembrane protein |
| AT5G14750                | 2.93                          | 3.09              | 9.02                          | myb family transcription factor           |
| AT5G10970                | 2.53                          | 7.76              | 9.74                          | zinc finger (C2H2 type) family protein    |
| AT4G01630                | 10.87                         | 32.65             | 99.38                         | expansin, putative                        |

| Gene Symbol |
|-------------|
| GLP9        |
| IAA1/AXR5   |
| PHYB        |
|             |
|             |
|             |
|             |
| IAA19       |
| DWF4        |
| ETO2        |
| ATEXLA2     |
|             |
|             |
| ATMYB66     |
|             |
| ATEXP17     |

| color key   |               |           |
|-------------|---------------|-----------|
| upregulated | downregulated | unchanged |
